# Supplementary material for: Gfi1b regulates the level of Wnt/β-catenin signaling in hematopoietic stem cells and megakaryocytes
Source: PubMed Central journal article supplement (PMC6426870; doi:10.1038/s41467-019-09273-z), 2019-03-20
Supplement: 41467_2019_9273_MOESM1_ESM.pdf [file 41467_2019_9273_MOESM1_ESM.pdf]

Gfi1b regulates the level of Wnt/ $\beta$ -catenin signaling in hematopoietic stem cells and megakaryocytes

Shooshtarizadeh et al

# Supplementary Figure.1

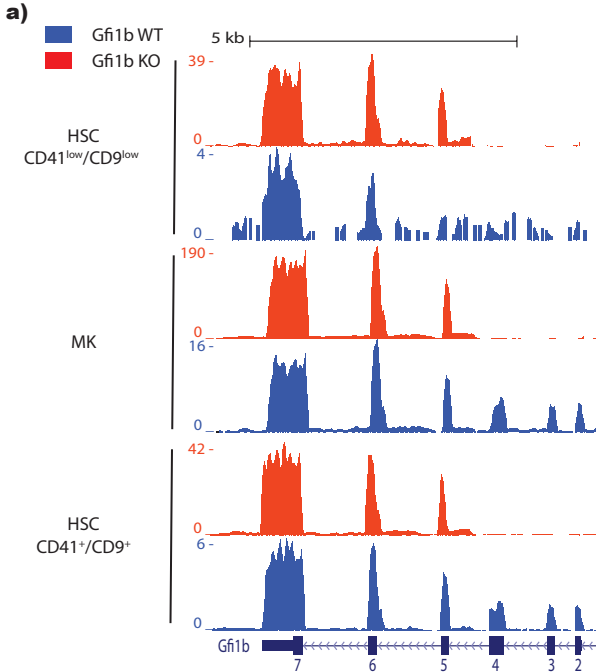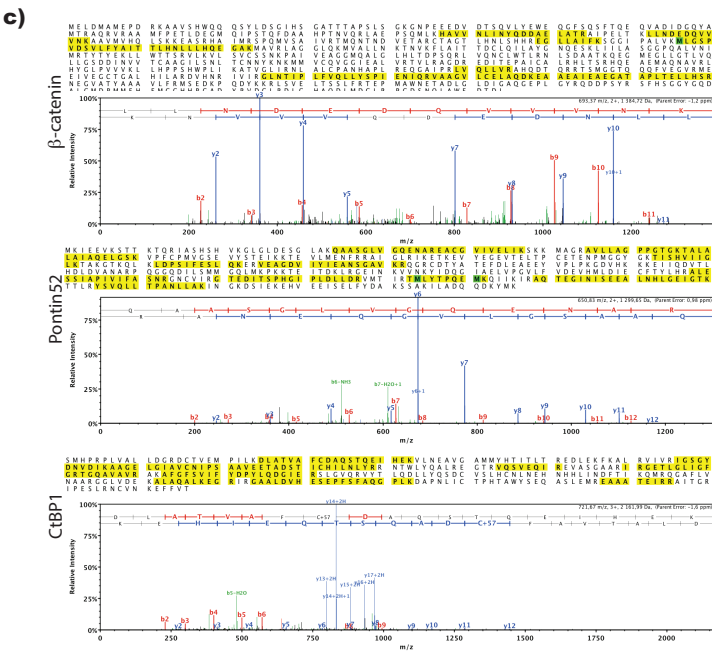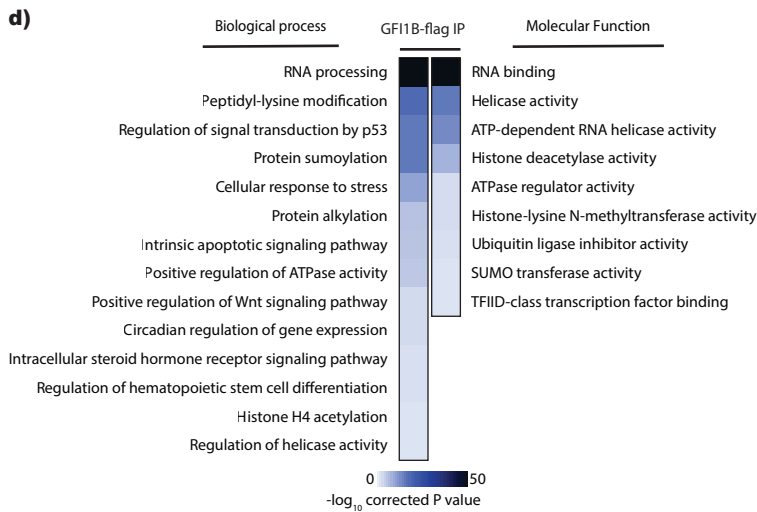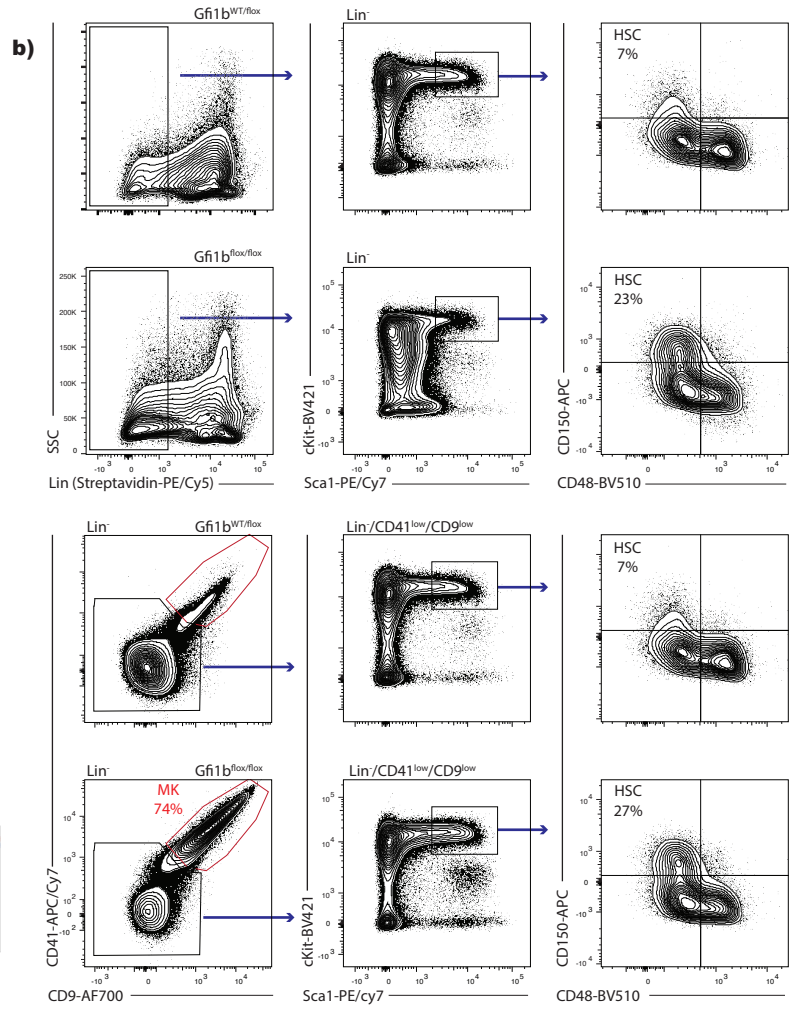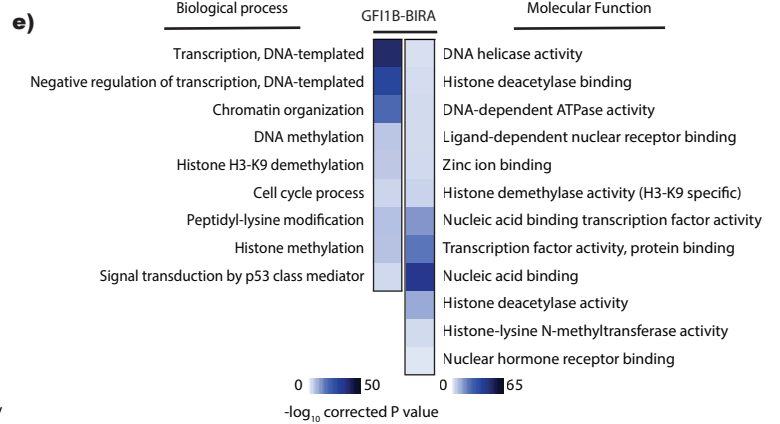

Supplementary Figure 1: Loss of Gfi1b in MKs and HSCs causes their expansion (a) Representative RNA-seq of Gfi1b gene in sorted MKs, HSC and HSC CD41<sup>low</sup>/CD9<sup>low</sup> cells showing deletion of exon 2 to 4 following Tamoxifen injection. (b) Representative FACS gating strategy, showing expansion of BM derived MKs and HSCs following deletion of Gfi1b. (c) Peptide sequence of  $\beta$ -catenin, Pontin52 and CtBP1. Peptides identified by mass spectrometry are highlighted and corresponding spectra are shown below. (d) Heat map illustrating biological processes and molecular functions of associated GO terms associated with the proteins found in HEK293 cells expressing GFI1B-Flag after immune-precipitation and mass spectrometric analysis. The enrichment score of each GO term is shown as the  $-\log_{10}$  of corrected P values, indicated by different color intensities. (e) Heat map illustrating biological processes and molecular functions of associated GO terms in Flp-In T-REx HEK293 cells expressing GFI1B-BirA<sup>\*</sup>-Flag. The enrichment score of each GO term is shown as the  $-\log_{10}$  of corrected P values, indicated by different color intensities.

# Supplementary Figure.2

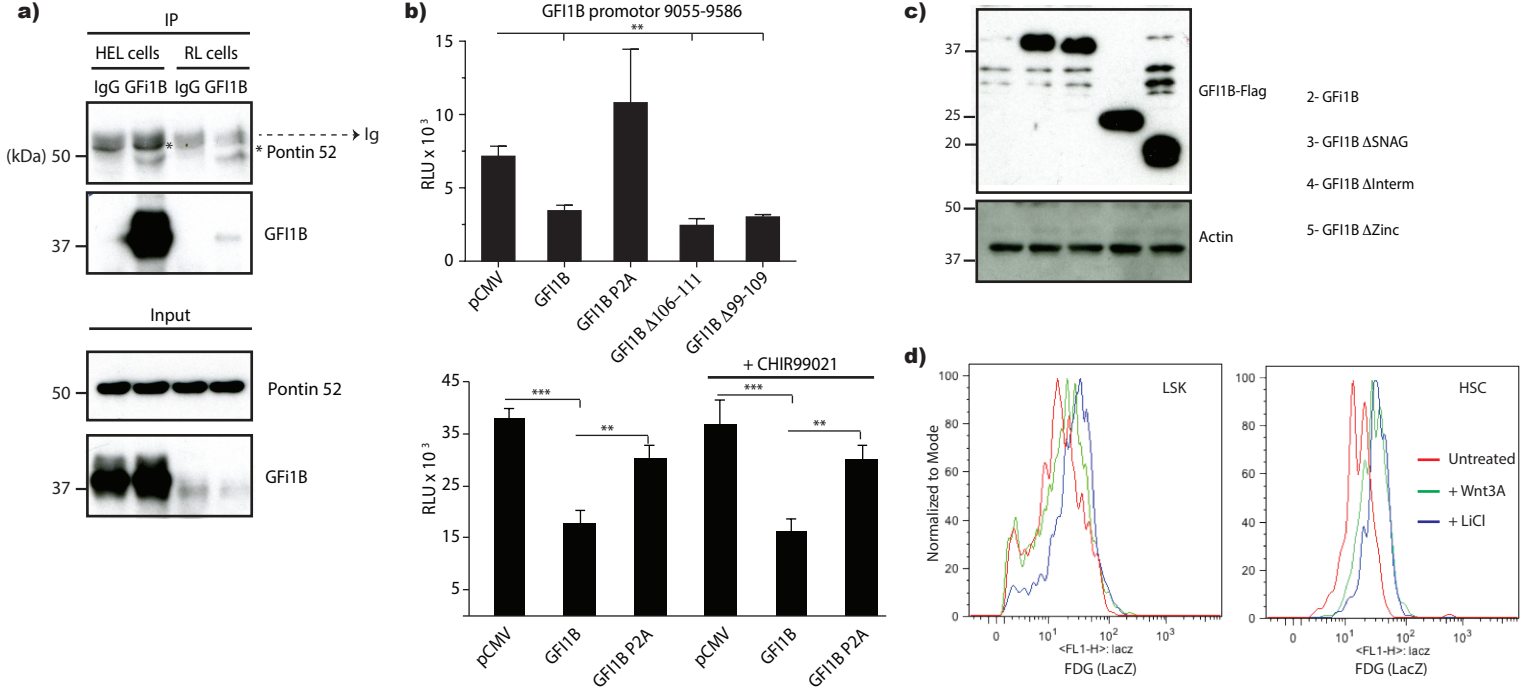

Supplementary Figure 2: GFI1B regulates transcription of a TCF dependent promoter/reporter system (a) Endogenous GFI1B IP shows interaction between GFI1B and Pontin52 in HEL cells. (b) GFI1B promoter luciferase assay in 293T cells. Cells were transfected with indicated vectors to show their ability to inhibit the expression of GFI1B promoter reporter. GFI1B binds to its promoter and inhibits its expression in a SNAG-domain dependent (see GFI1B P2A mutation). The newly identified WRD is not required for the repressor activity of GFI1B (top). GFI1B maintains its repressor activity following activation of Wnt/  $\beta$ -catenin signaling by treatment with CHIR99021 (bottom) (\*  $P < 0.05$ , \*\*  $P < 0.001$ , \*\*\*  $P < 0.0001$  on a Welch corrected T-test, error bars show s.d). (c) Western blotting on lysates from reporter assay samples in Fig. 3f to check the expression of the transfected vectors. (d) lacZ staining of LSKs and HSCs from Axin II +/-lacZ mice, following treatment with LiCl and Wnt3a that shows an increase in lacZ MFI.

### Supplementary Figure.3

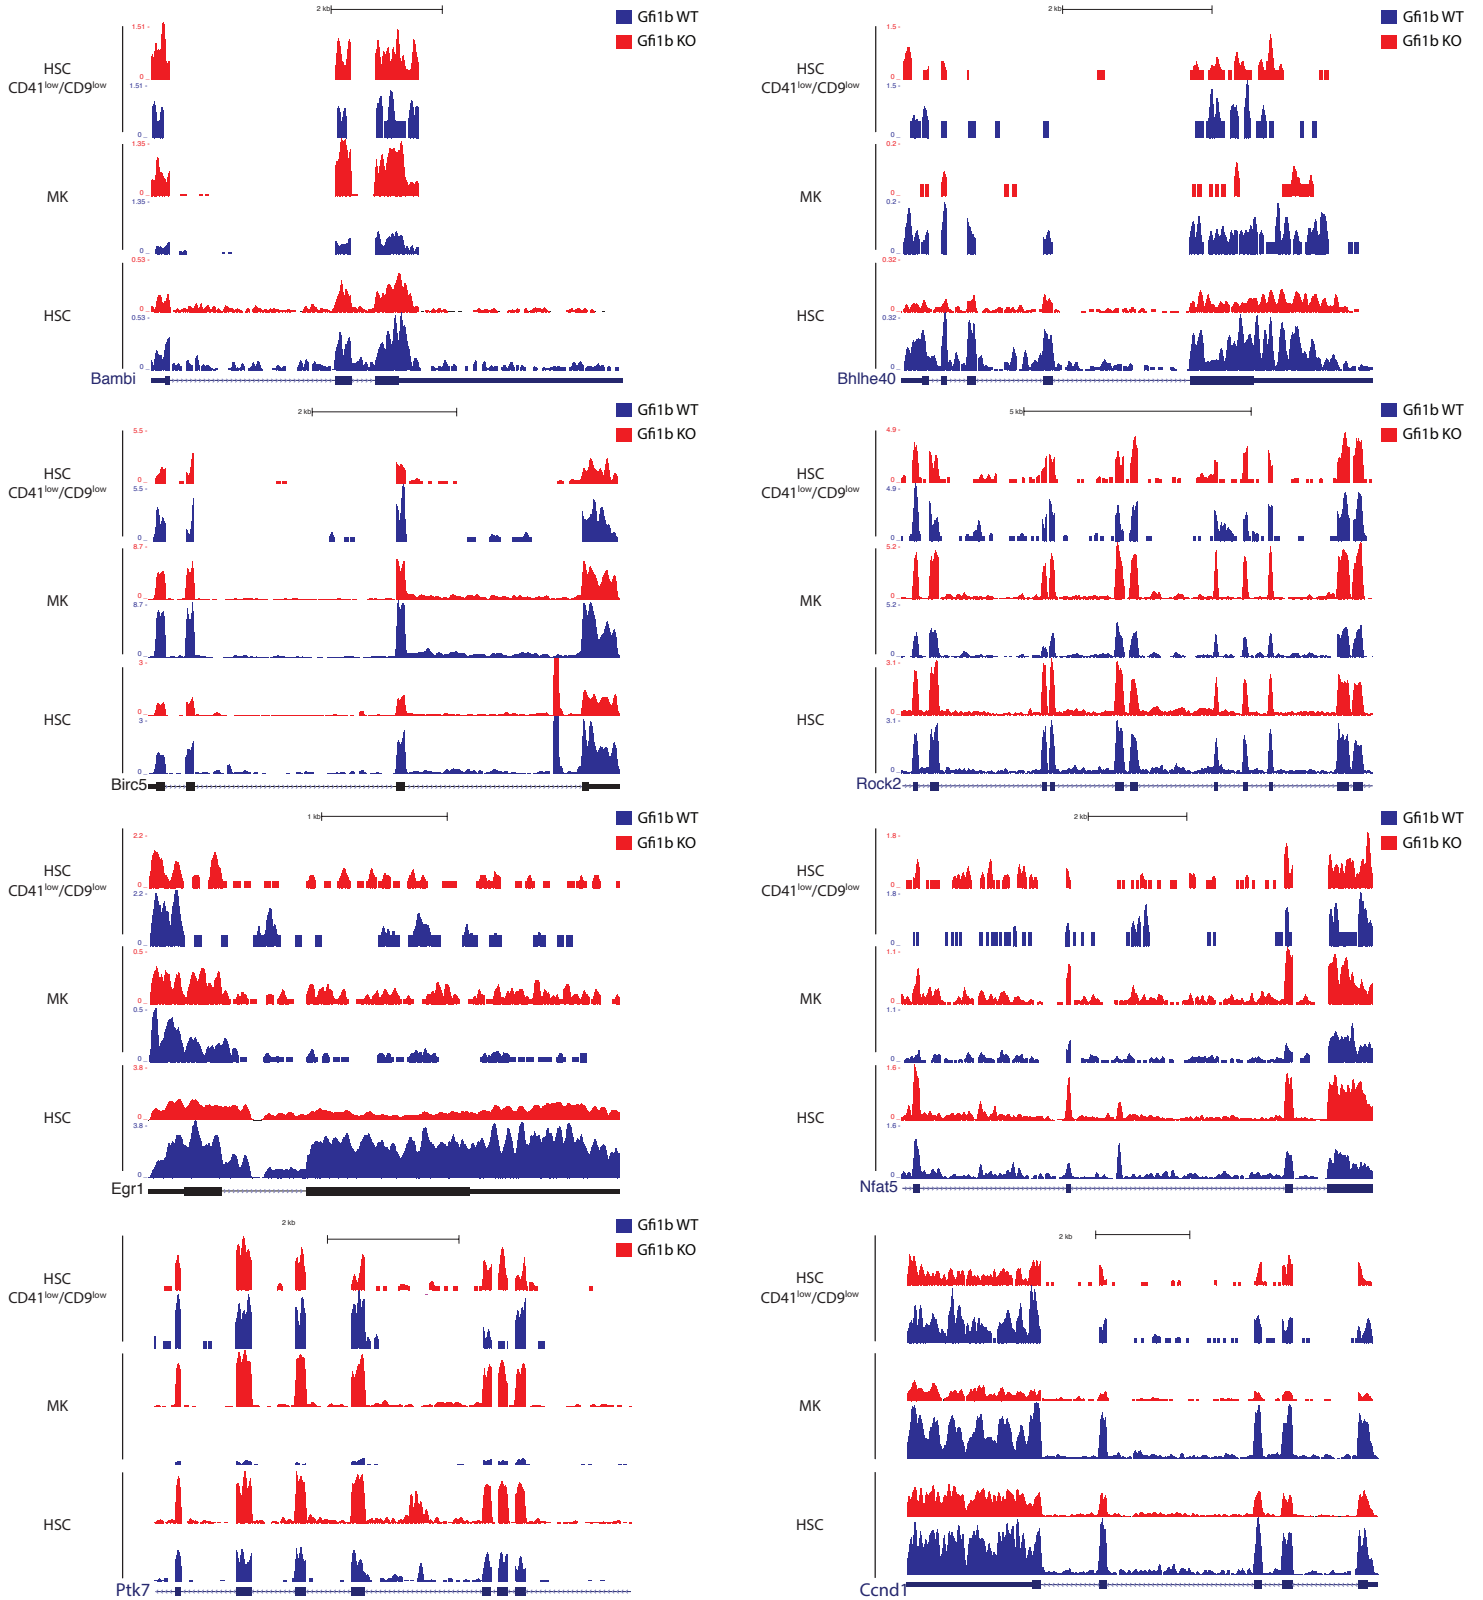

Supplementary Figure 3: Representative RNA-seq data from sorted MKs, HSCs and HSCs CD41<sup>low</sup>/CD9<sup>low</sup> Gfi1b WT/KO cells for selected genes.

# Supplementary Figure.4

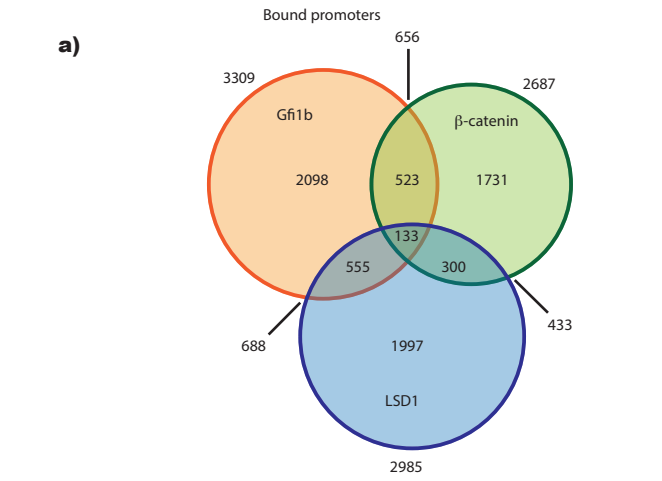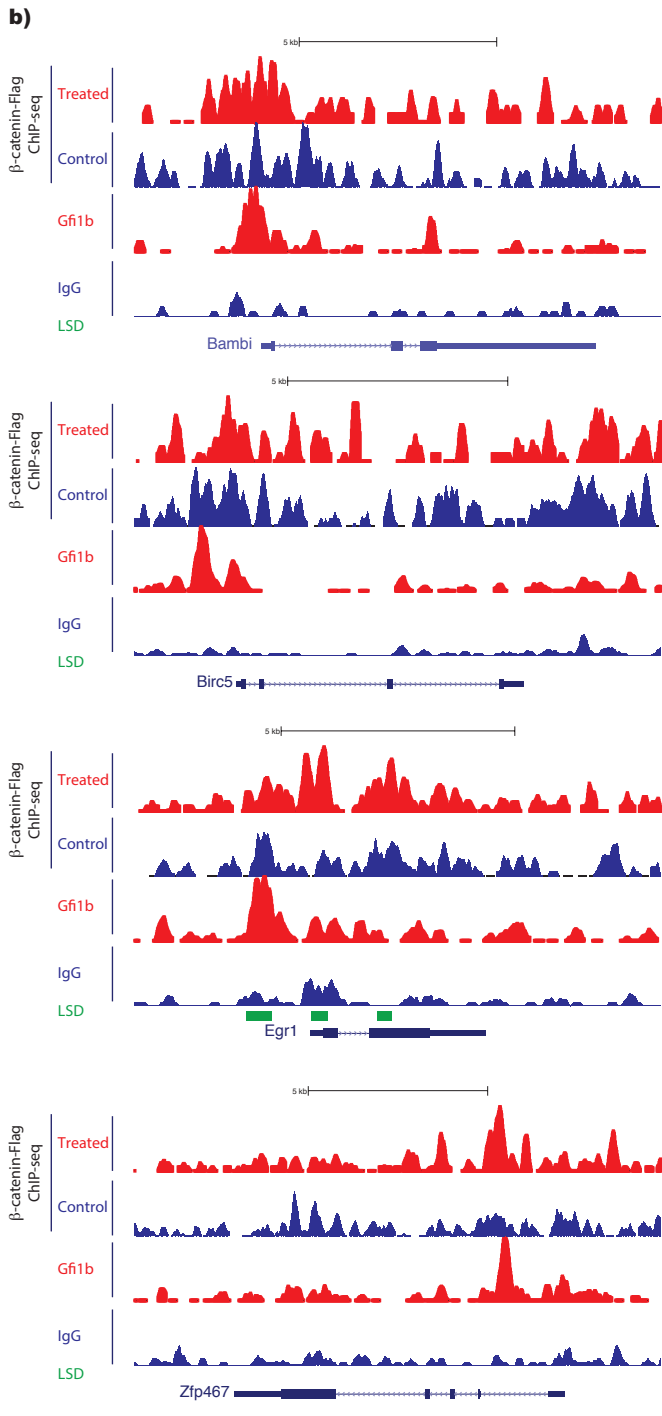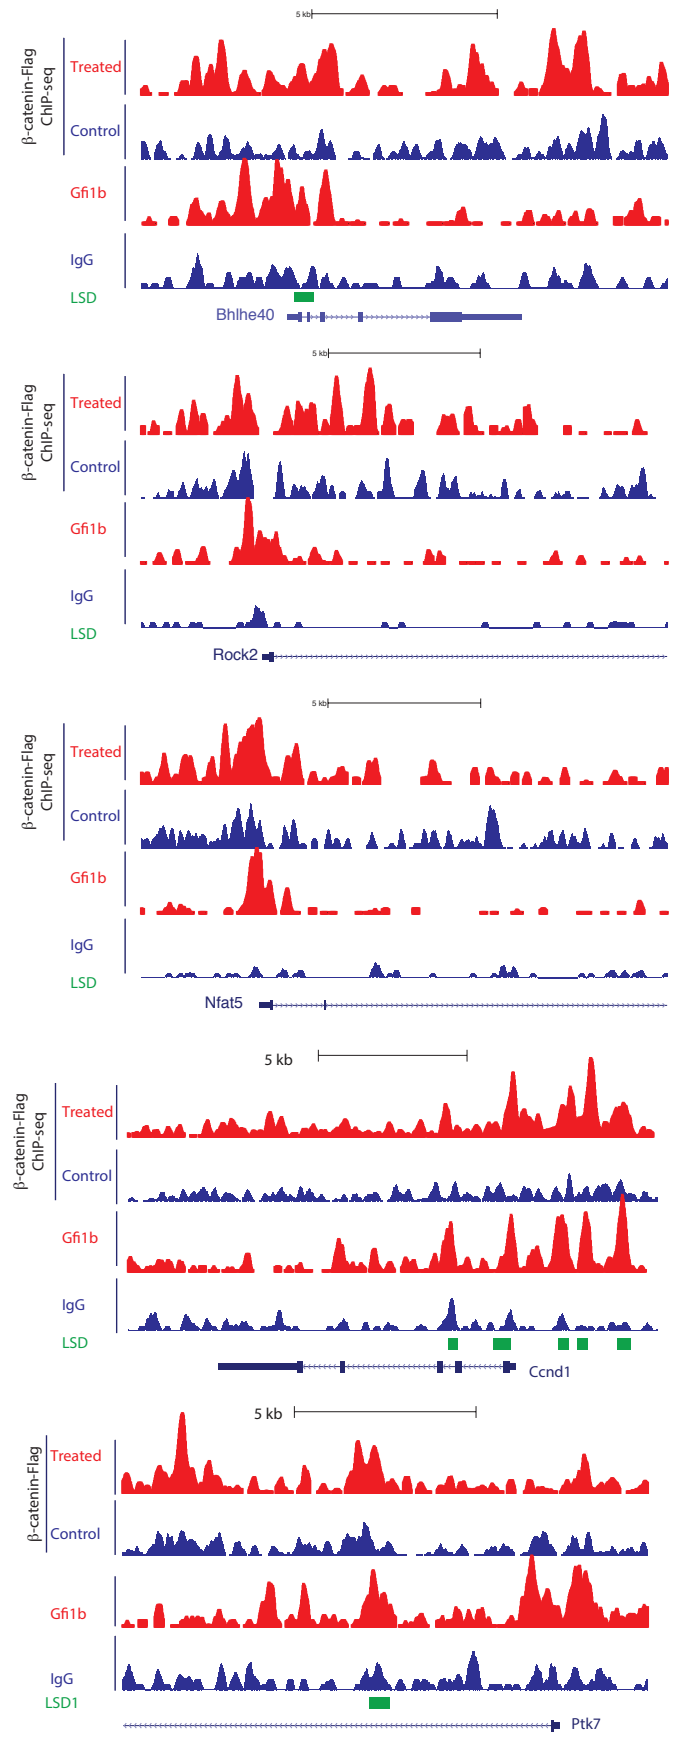



Supplementary Figure 4: Gfi1b,  $\beta$ -catenin and LSD1 occupy common genes promoter targets. Previously published ChIP-seq data for Gfi1b in HPC7 cell line 38,  $\beta$ -catenin and LSD1 in ES cells 39, 40 were used for this meta-analysis. (a) Venn diagram showing gene promoters bound, uniquely and in common, by Gfi1b,  $\beta$ -catenin and LSD1. (b) A representative example for ChIP-seq peaks showing read density at the promoter of selected genes. Note that LSD1 ChIP-seq data is shown as horizontal green bars indicating LSD1 binding.

# Supplementary Figure.5

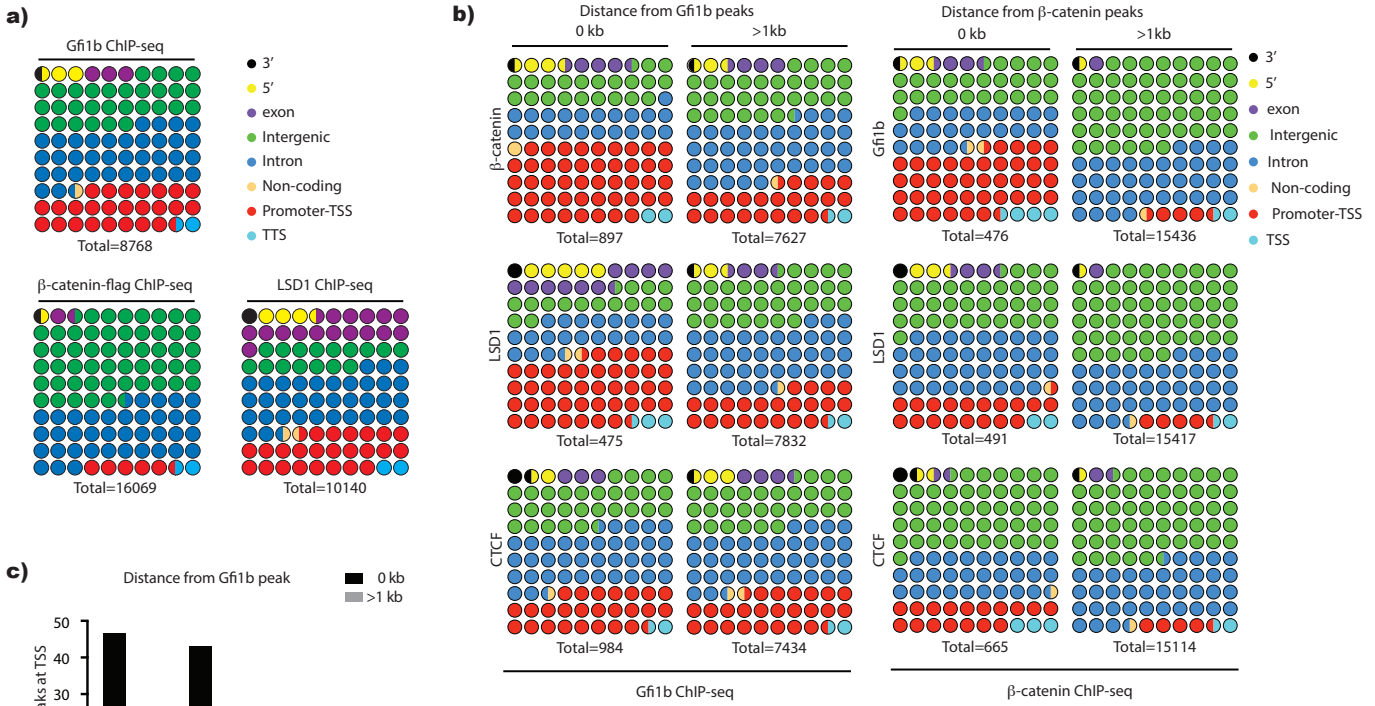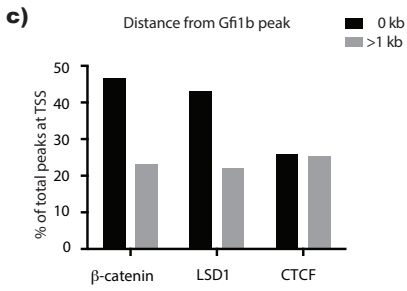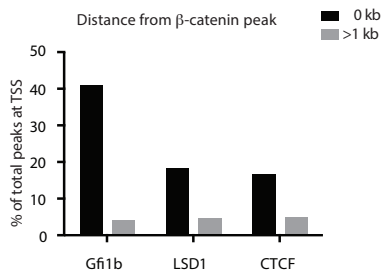

Supplementary Figure 5: Gfi1b and  $\beta$ -catenin occupy common positions at their target genes. (a) Overall distribution of called peaks in each individual previously published ChIP-seq data. (b) Meta-analysis of indicated ChIP-seq data for peak positioning based on their distance to Gfi1b peaks in the used Gfi1b ChIP-seq data set (left panel) or  $\beta$ -catenin peaks in the used  $\beta$ -catenin ChIP-seq dataset (right panel). (c) Frequency of the indicated ChIP-seq peaks at the transcription start site (TSS) based on their distance to Gfi1b peaks in Gfi1b ChIP-seq (top graph) or  $\beta$ -catenin peaks in  $\beta$ -catenin ChIP-seq (bottom graph).

# Supplementary Figure.6

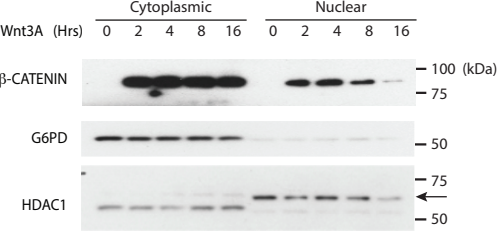

Supplementary Figure 6: Western blot on K562 cells treated with Wnt3A

# Supplementary Figure.7

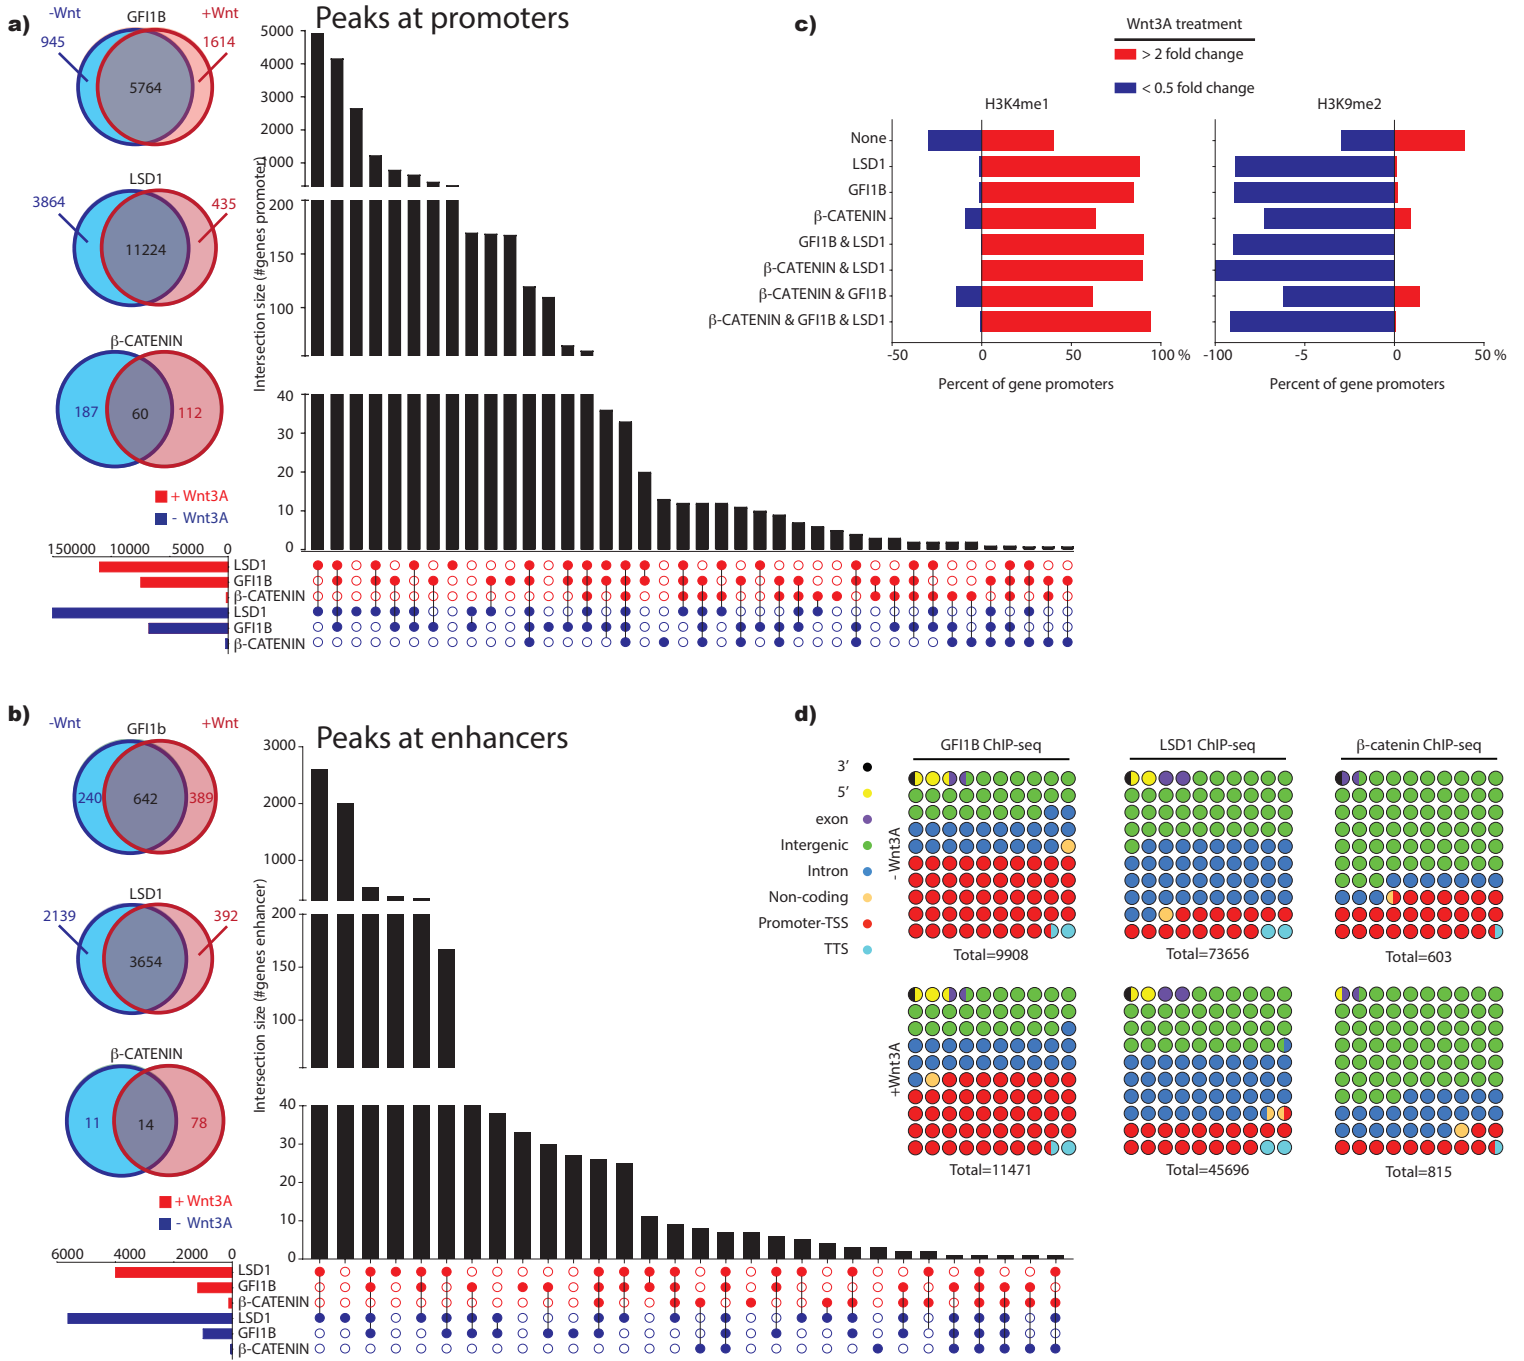

Supplementary Figure 7: GFi1b,  $\beta$ -catenin and LSD1 co-occupy sites at enhancer regions and gene promoters (a-b) Upset plot and Venn diagrams showing number of promoters (in a) and enhancer regions (in b) co-occupied by GFI1B,  $\beta$ -catenin and LSD1 in K562 ChIP-seqs. Venn diagrams show numbers of bound promoters (in a) and enhancers (in b) by each factor individually before and after Wnt3A treatment. (c) Proportion of genes with H3K4me1 and H3K9me2 fold changes at genes promoters targeted as indicated in K562 following treatment with Wnt3A. (d) Overall distribution of called peaks in each individual ChIP-seq data.

# Supplementary Figure.8

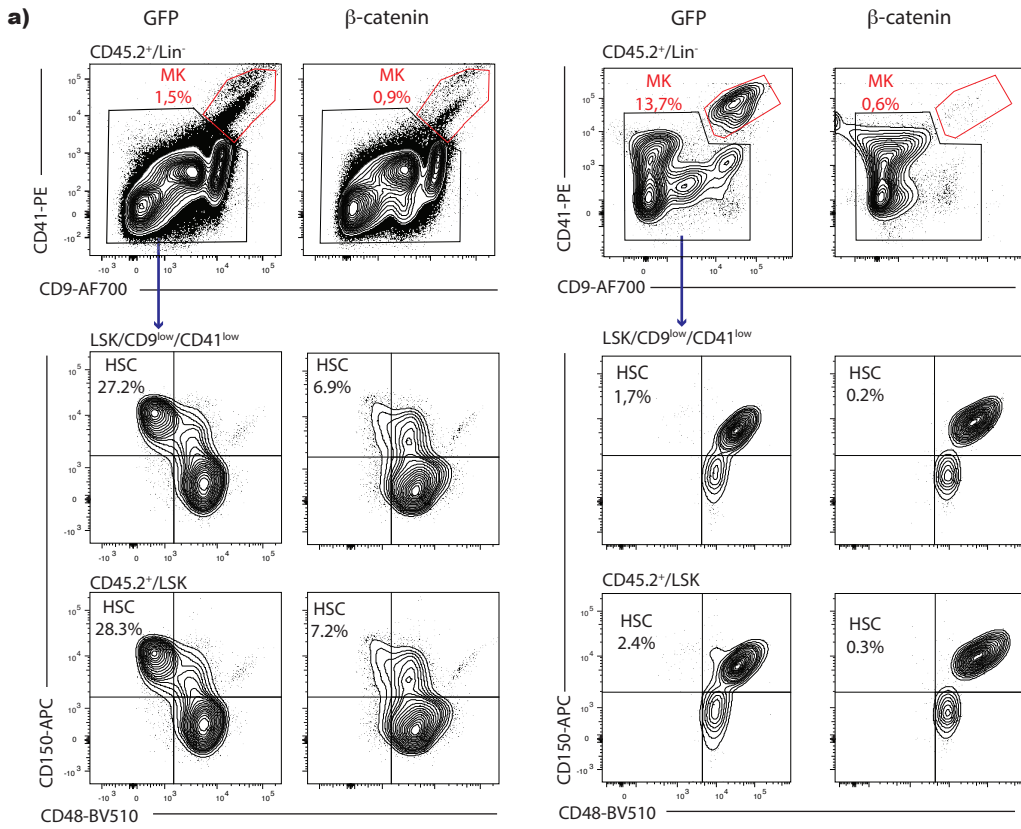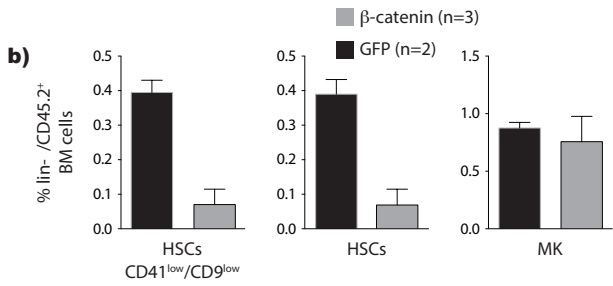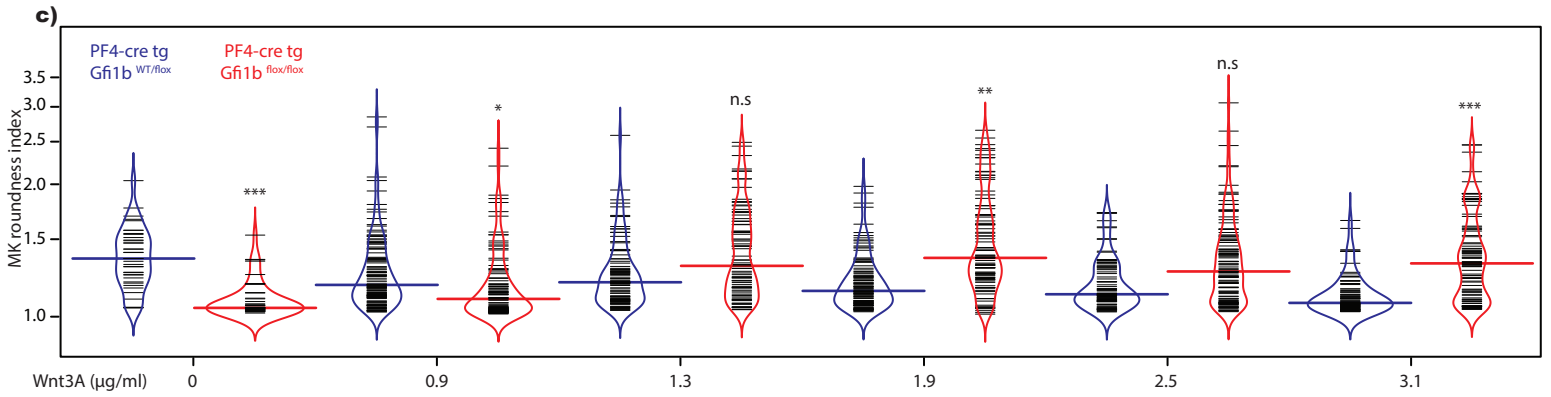



Supplementary Figure 8: Up-regulation of canonical Wnt signaling rescues Gfi1b deficient phenotypes in HSCs and MKs (a-b) Activating the canonical Wnt signaling by retroviral expression of active  $\beta$ -catenin, inhibits HSCs and MKs expansion in Gfi1b KO cells. CD45.2 Gfi1b KO lineage depleted cells were infected with retrovirus expressing active form of  $\beta$ -catenin or GFP. Irradiated CD45.1 mice were transplanted with the infected cells and analyzed by FACS3 4 months post transplantation and HSCs and MKs numbers were quantified. (c) Spreading of Gfi1b WT/KO MKs on Fibronectin coated matrices is affected by Wnt3A treatment at increasing concentrations. Statistical analysis was done for each pair of Gfi1b WT/KO at the given Wnt3A concentration (\*  $p < 0.05$ , \*\* $p < 0.001$ , \*\*\* $p < 0.0001$  on a Welch corrected T-test, error bars show s.d)

Fig 2d

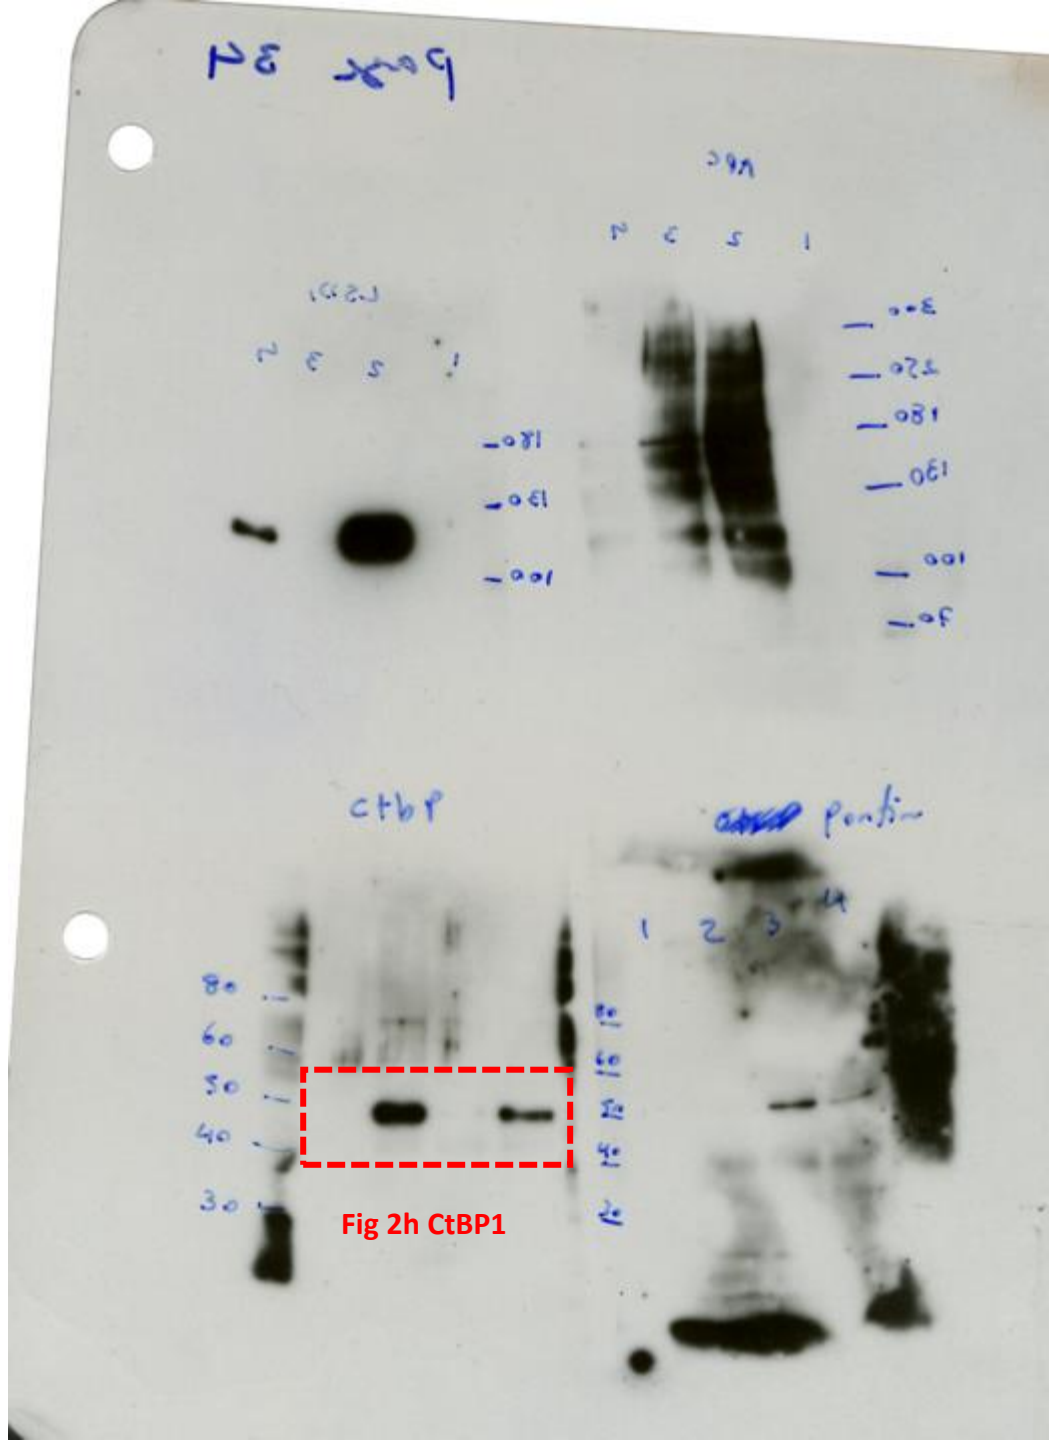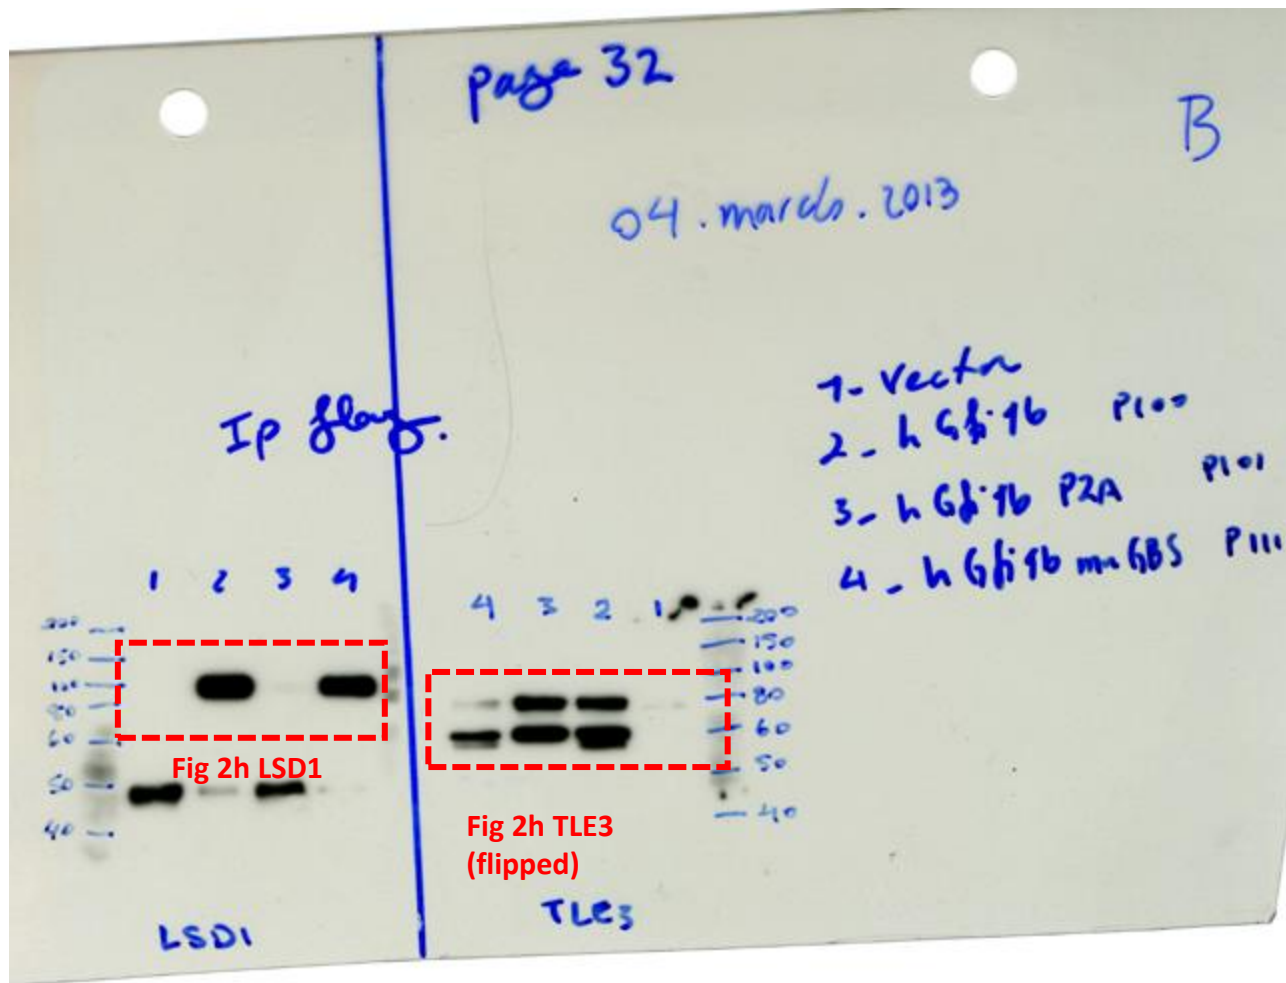

Fig 2d

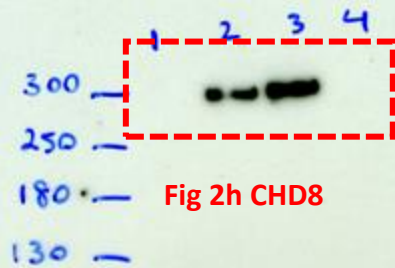

Fig 2h CHD8

1 = Vector  
2 = hsf1b flg  
3 = hsf1b-P2A-  
4 = hsf1b mured.

Page 32

04 March 2013

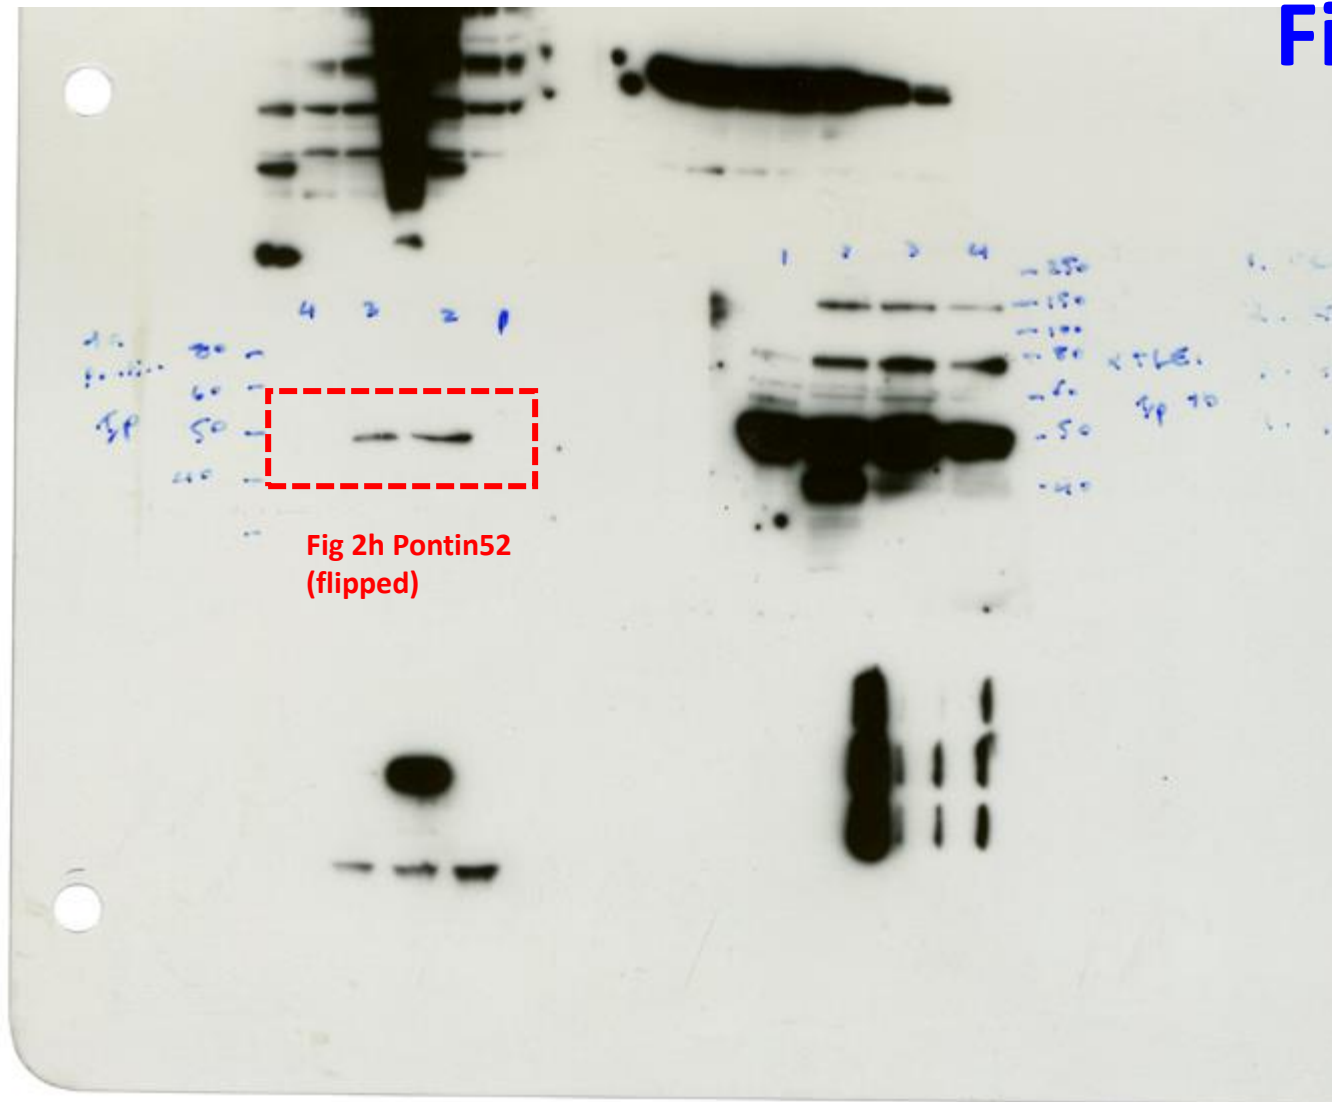

Fig 2h Pontin52  
(flipped)

Fig 2d

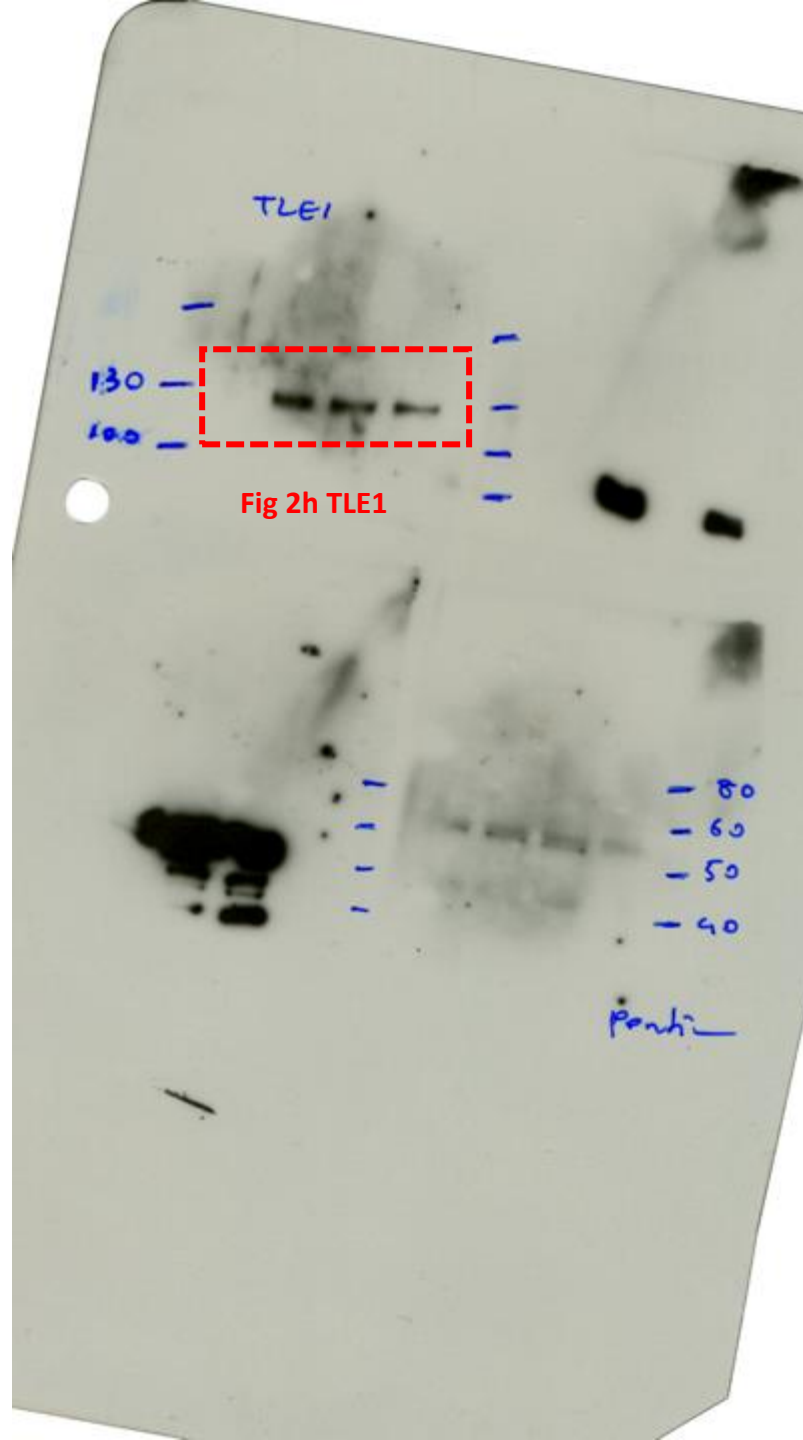

Fig 2h TLE1

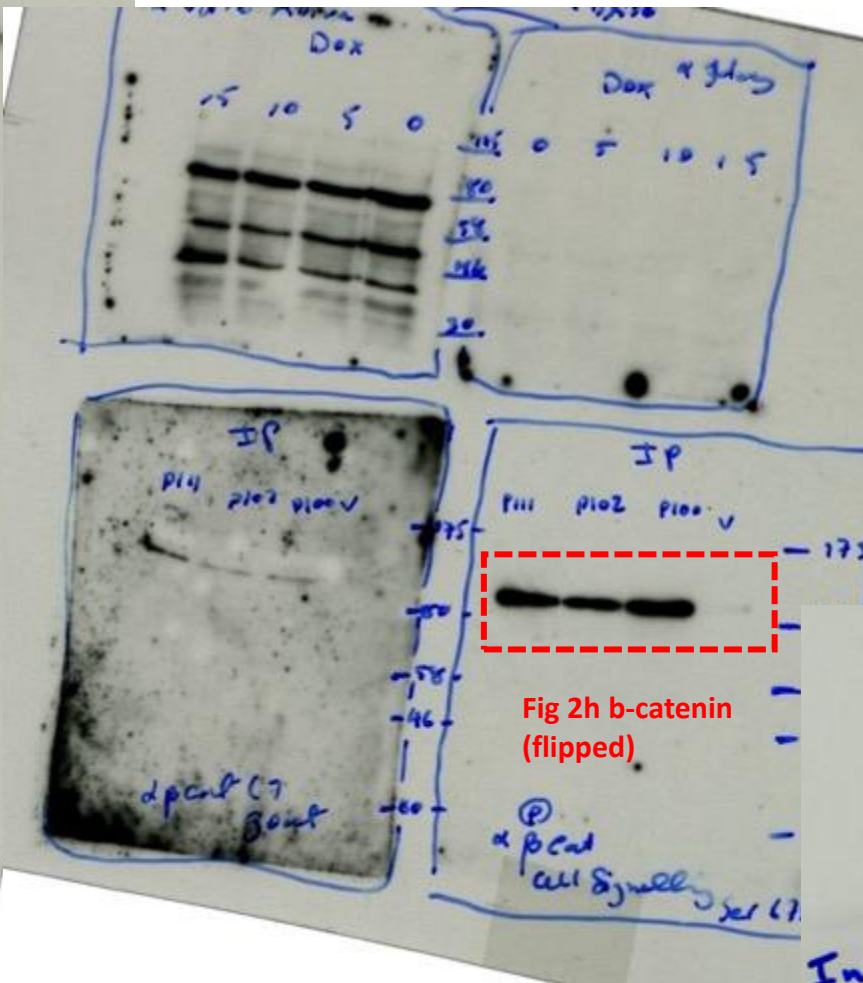

Fig 2h b-catenin (flipped)

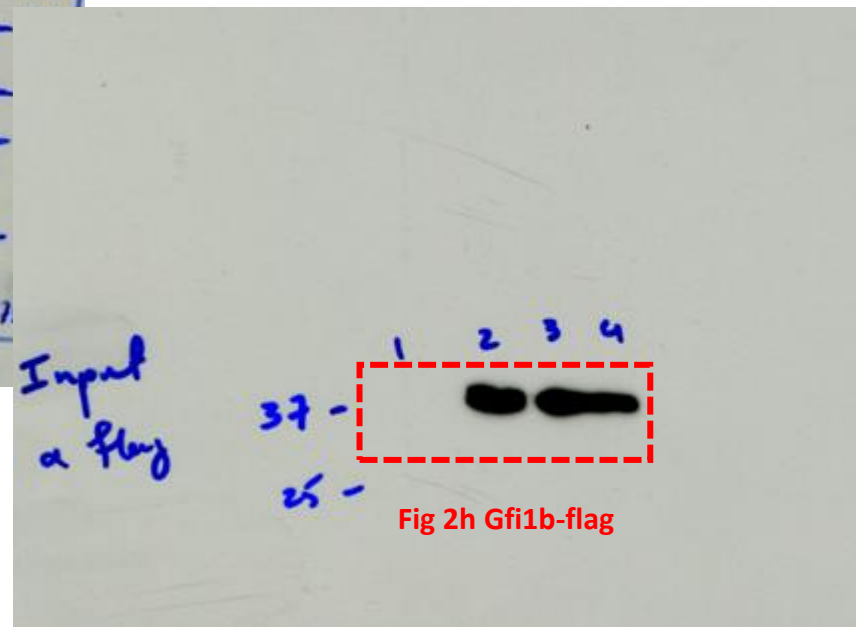

Fig 2h Gfi1b-flag

Fig 2e

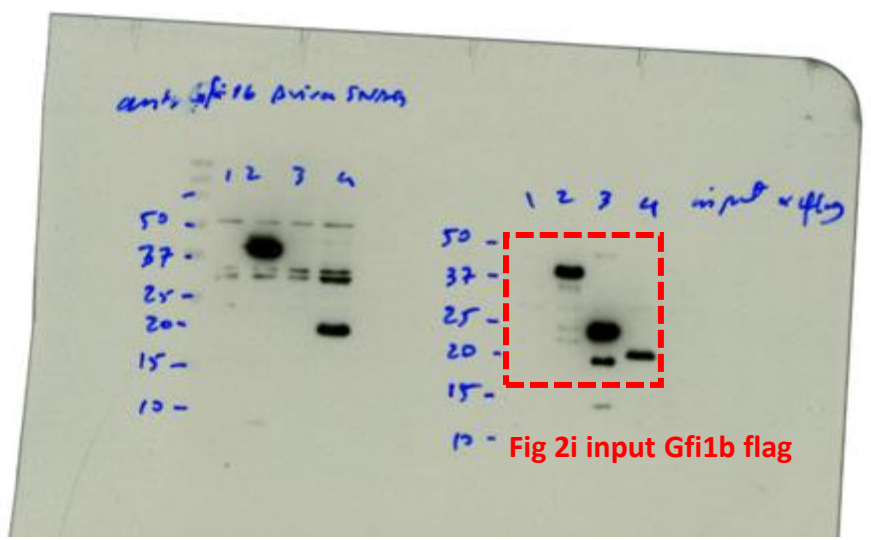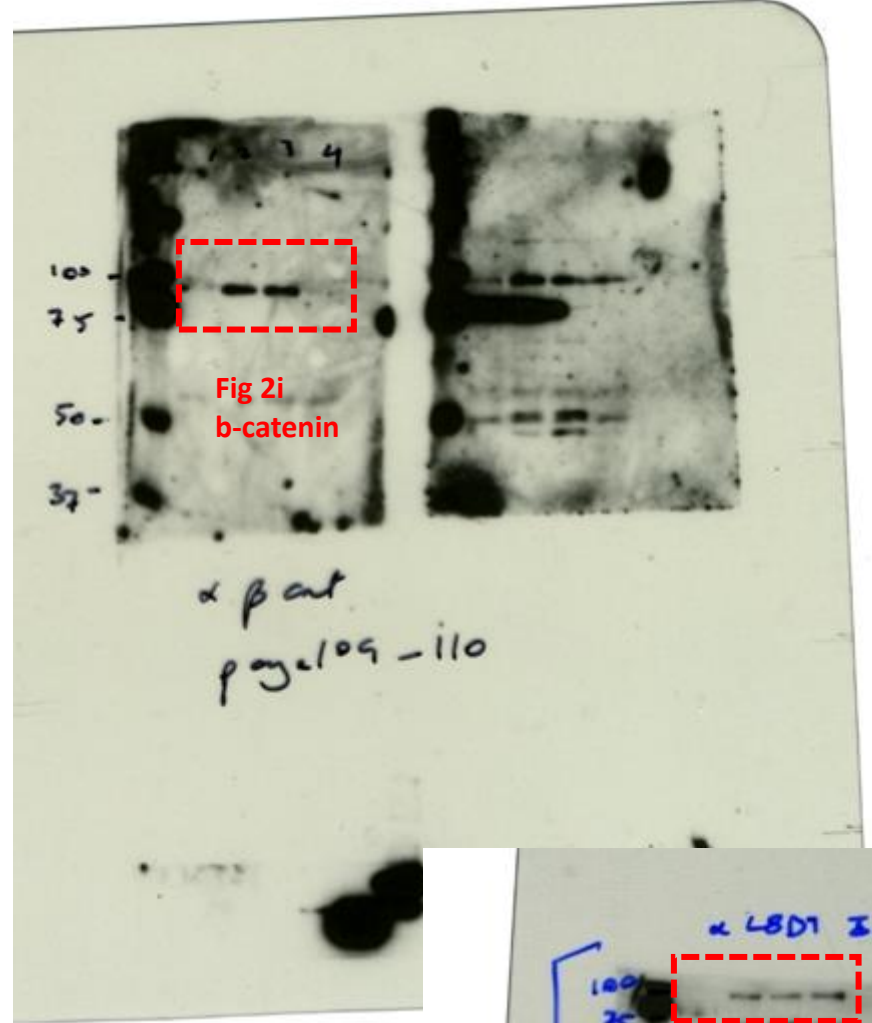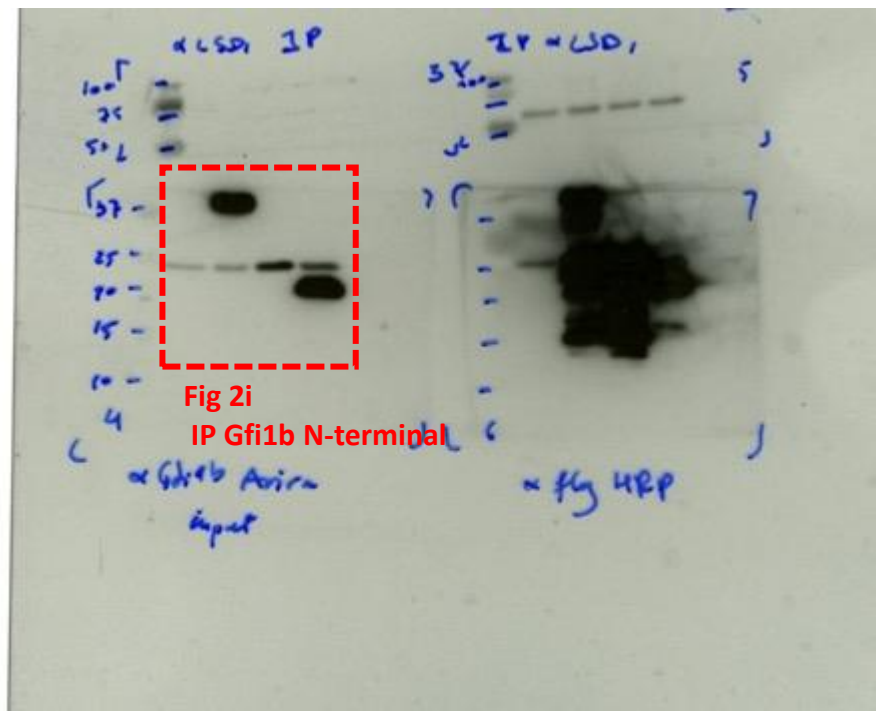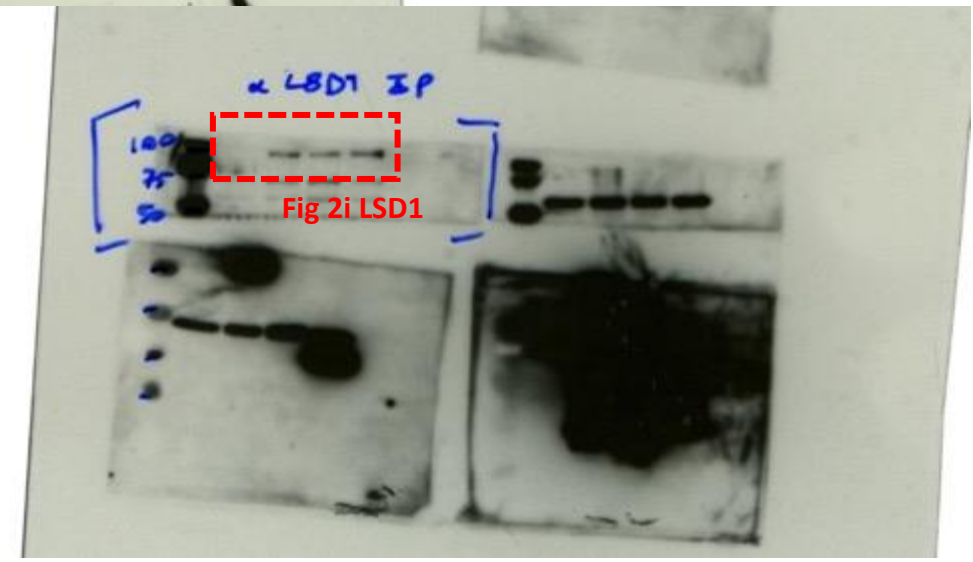

# Fig 2f

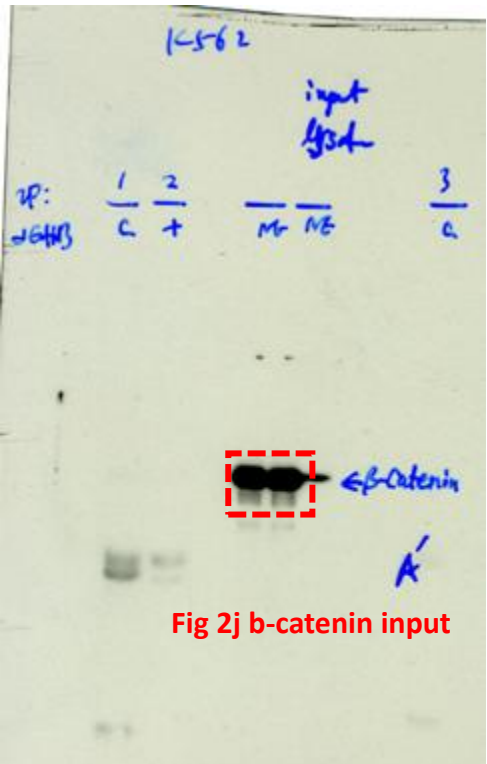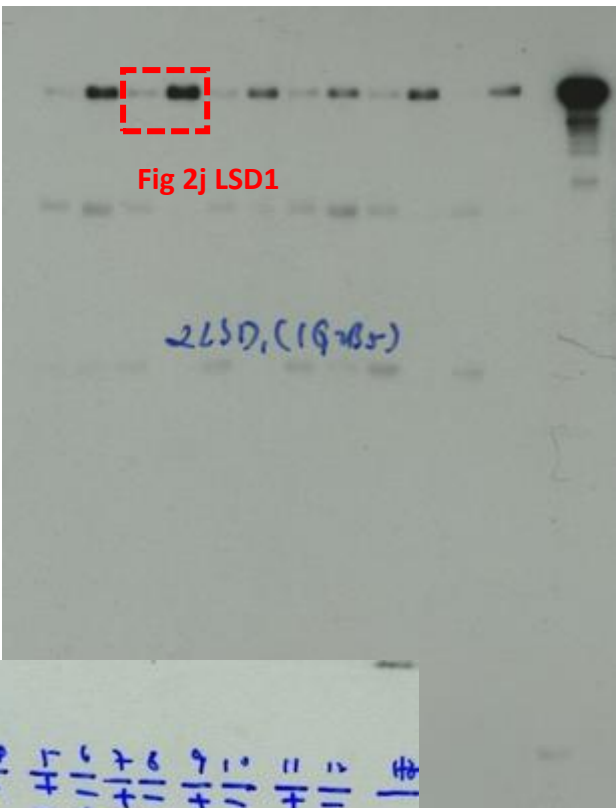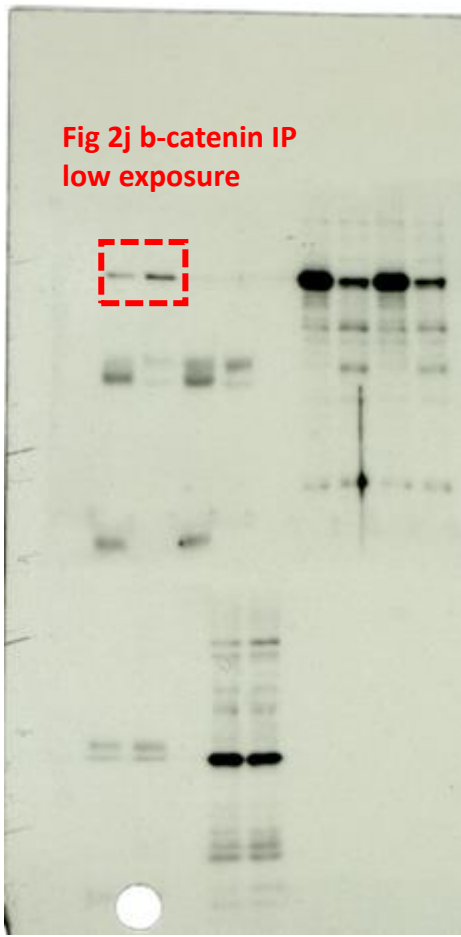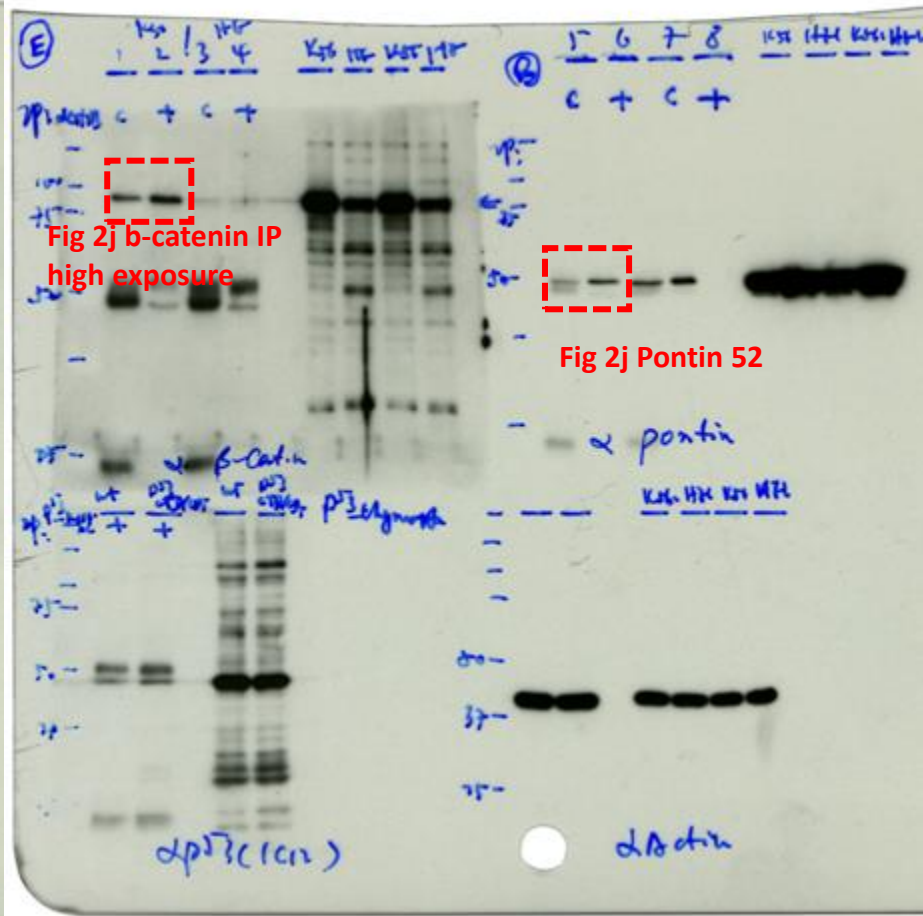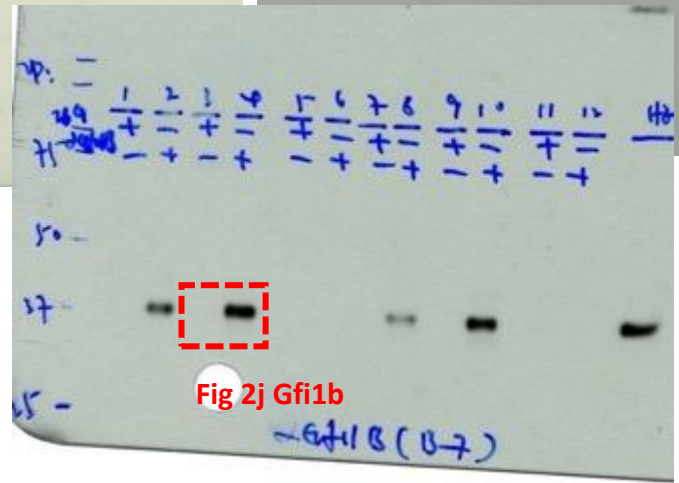

# Fig 2g

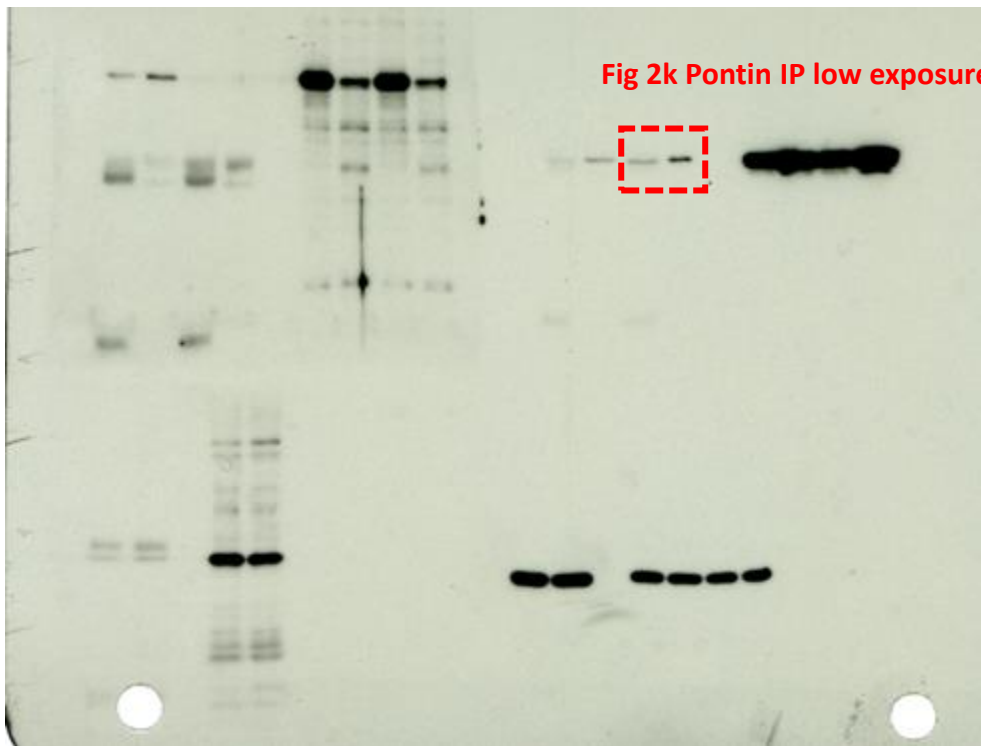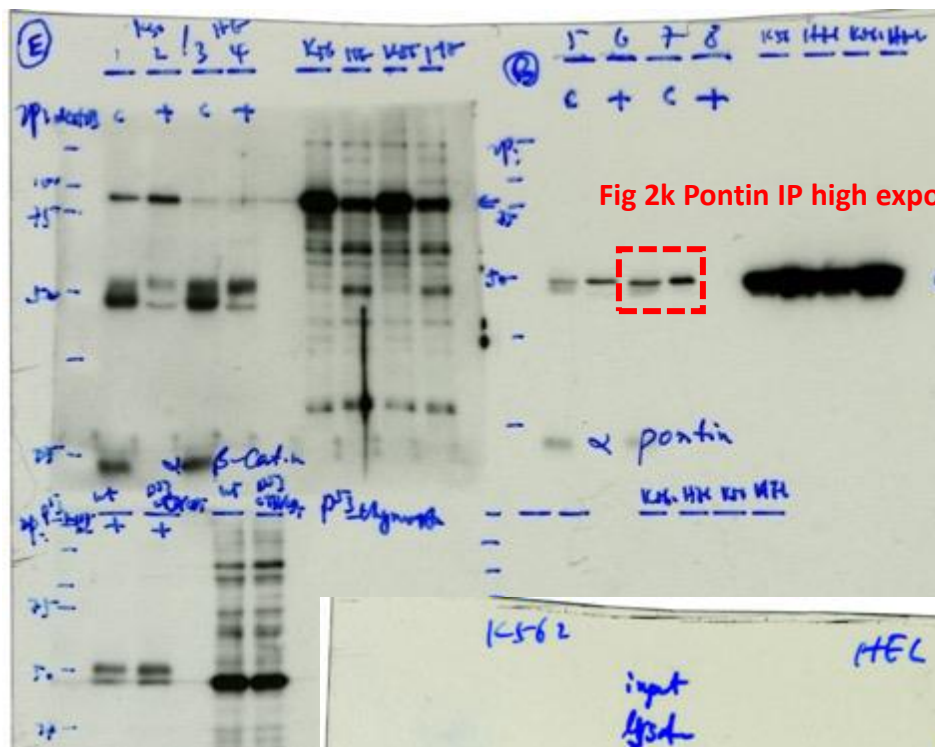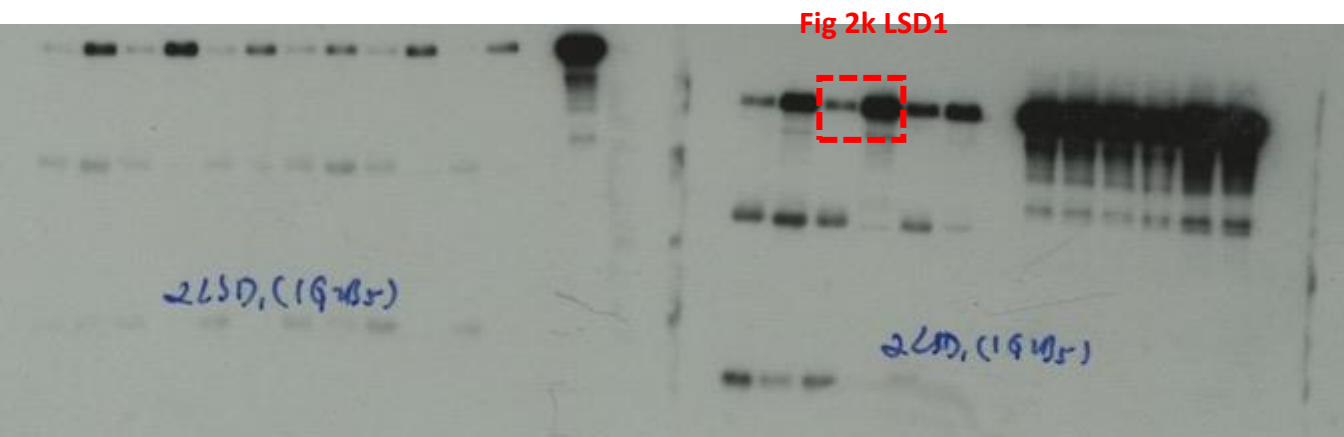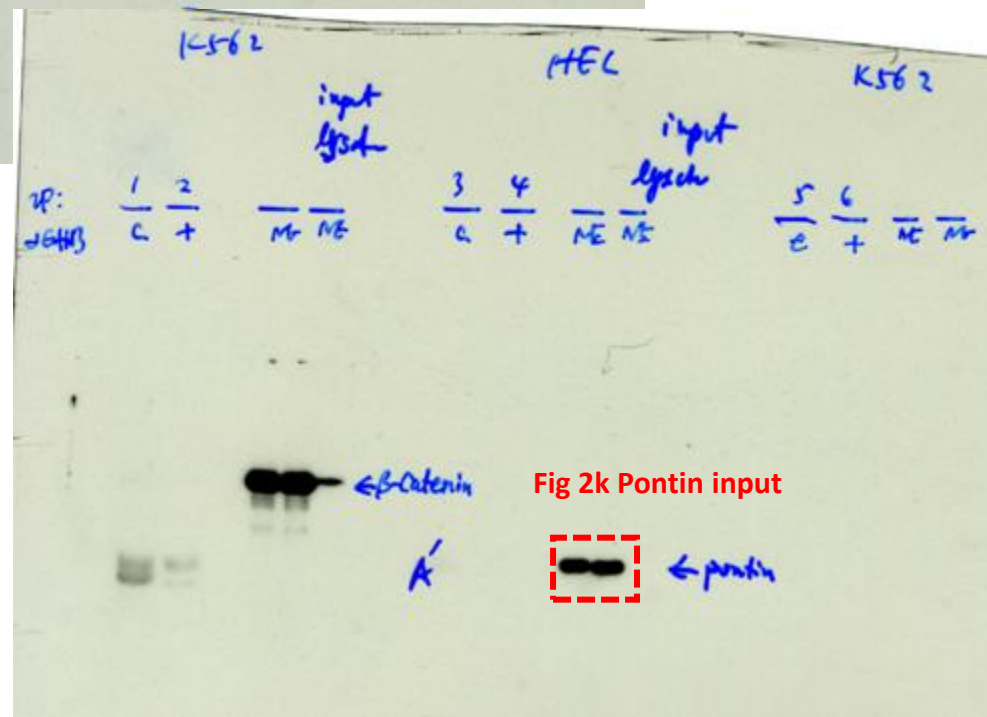





Fig 2j

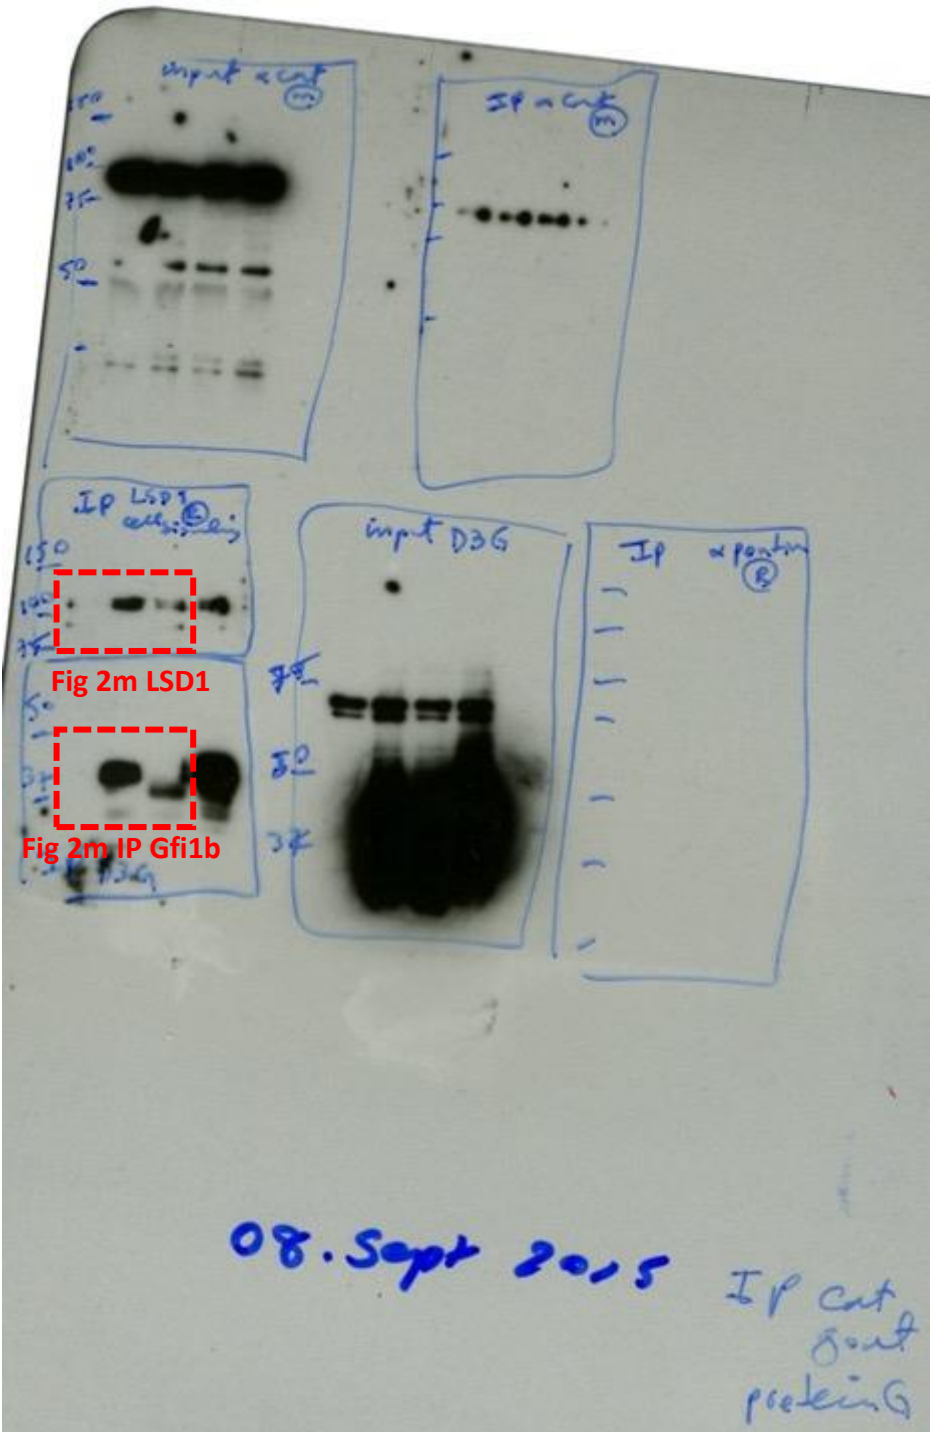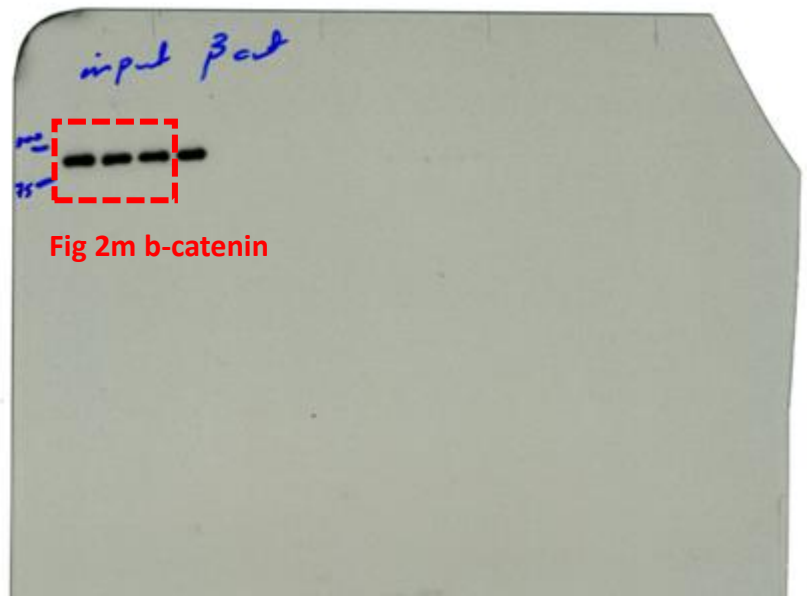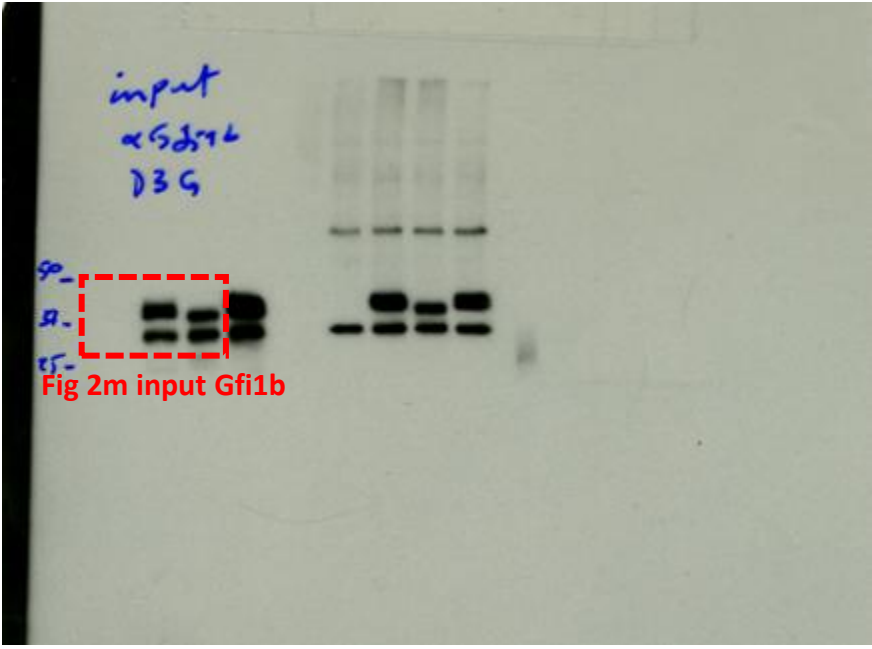

Fig 2k

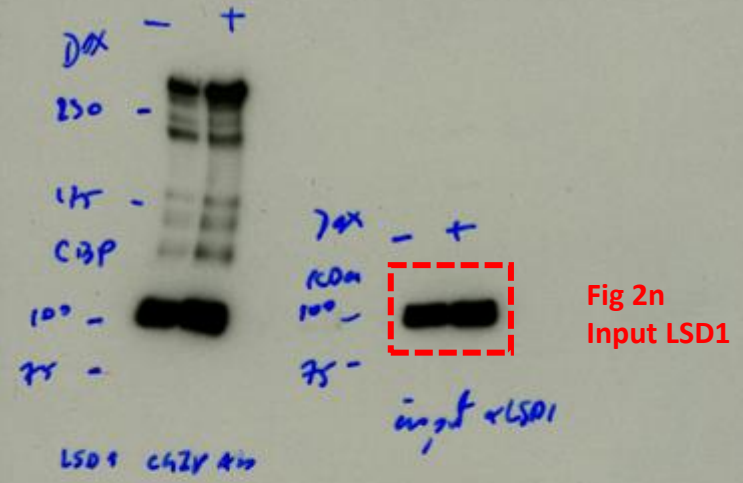

Fig 2n  
Input LSD1

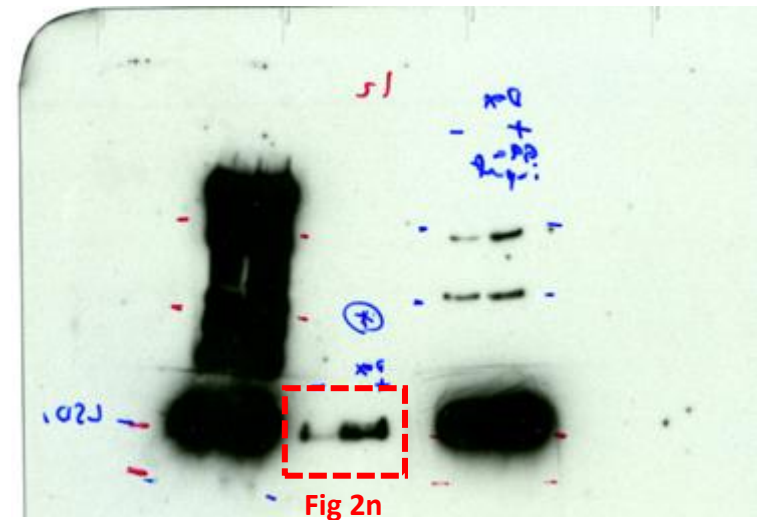

Fig 2n  
pull down LSD1

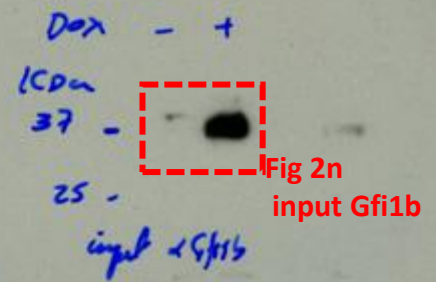

Fig 2n  
input Gfi1b

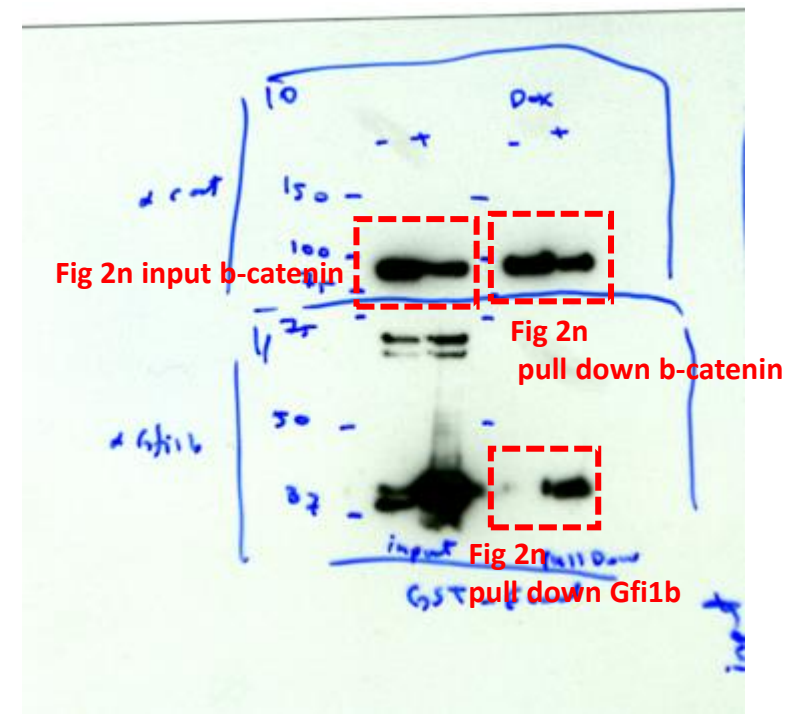

Fig 2n input b-catenin

Fig 2n  
pull down b-catenin

Fig 2n  
pull down Gfi1b

# Fig 2h

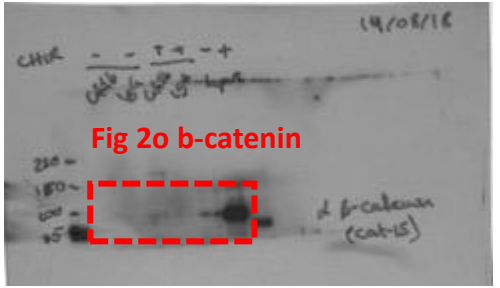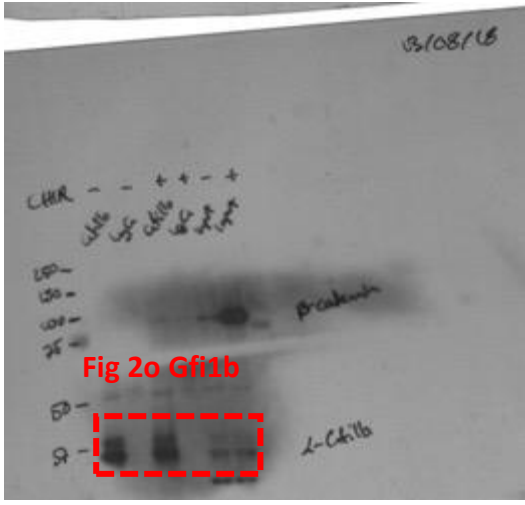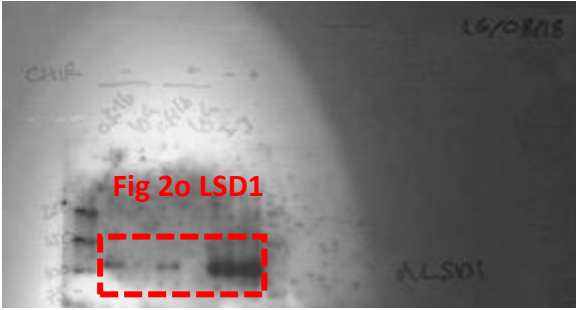

Fig 3I

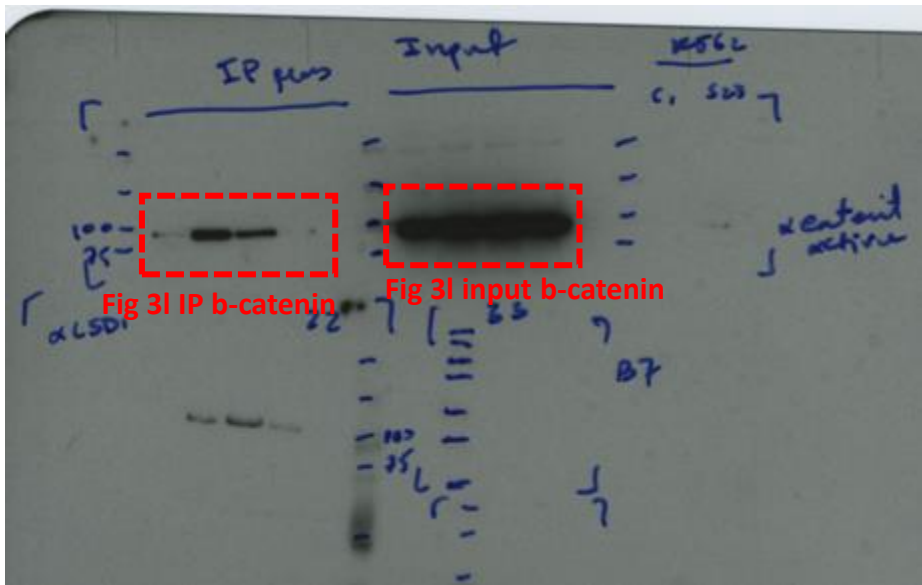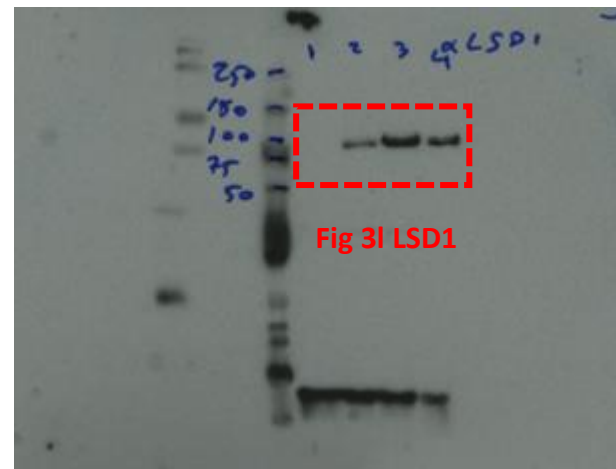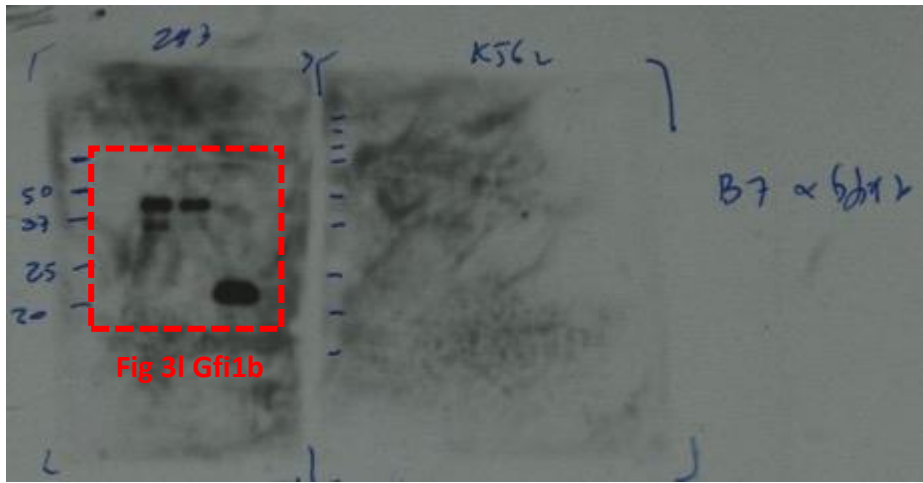

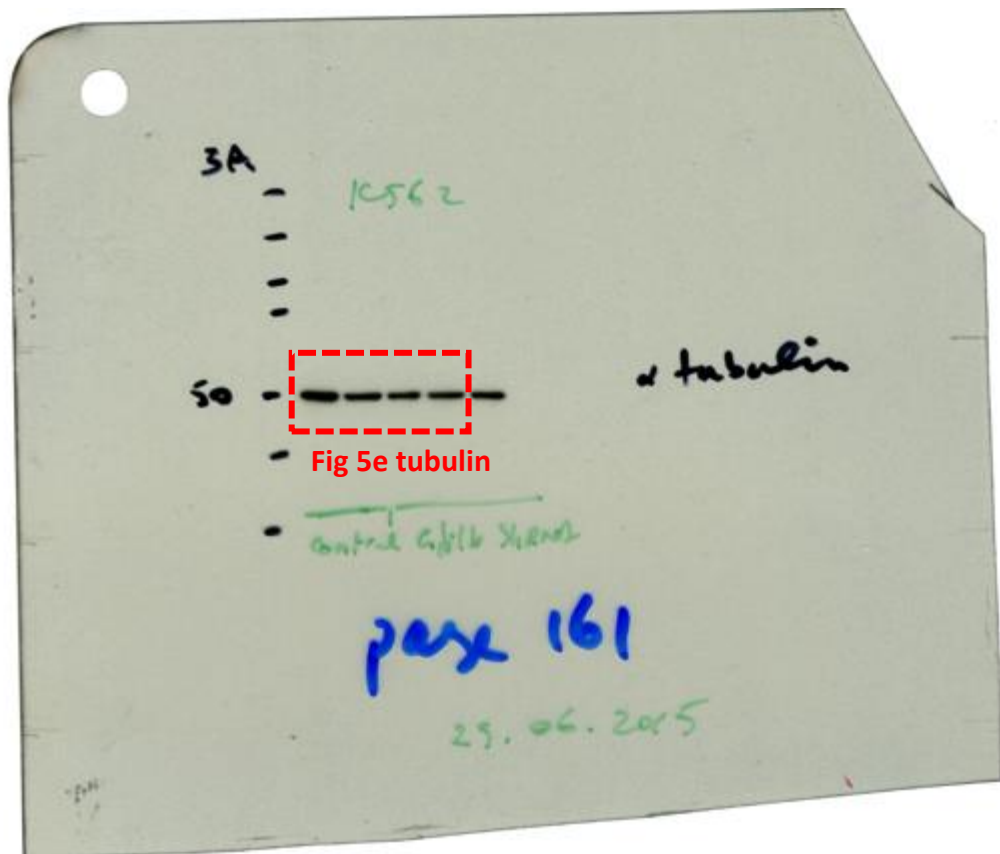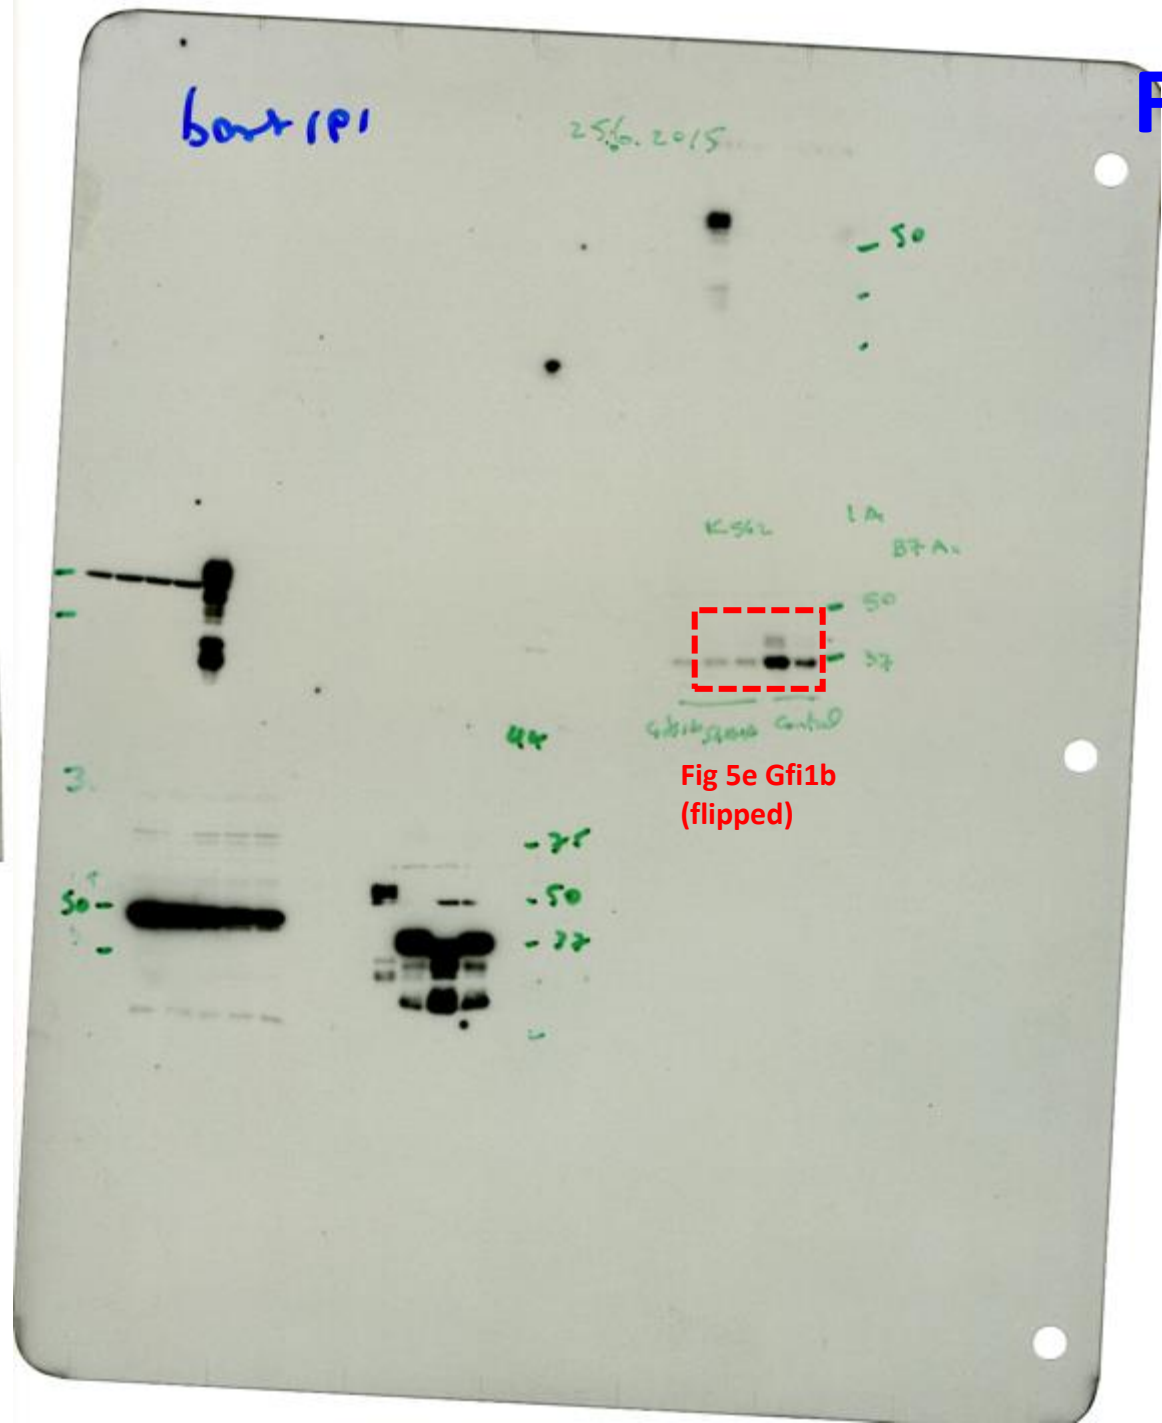

Fig 5e

# Suppl Fig 2a

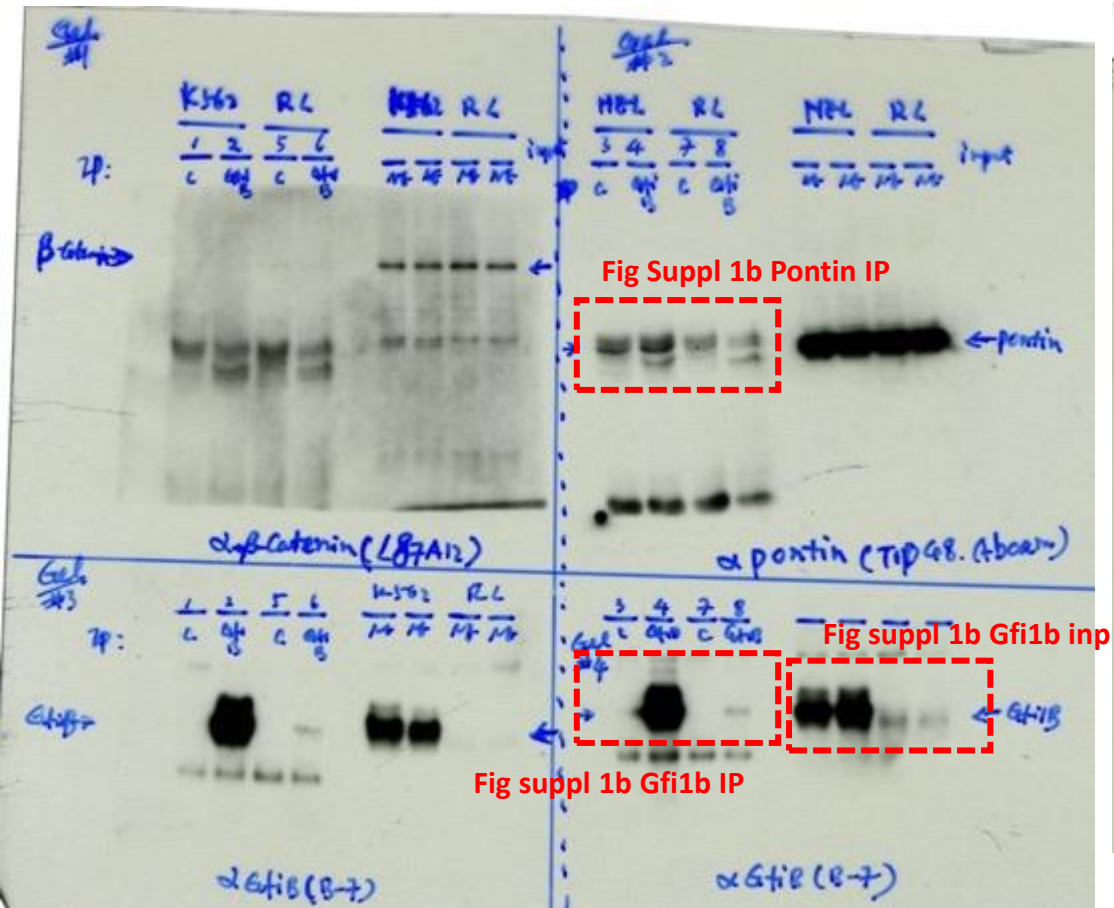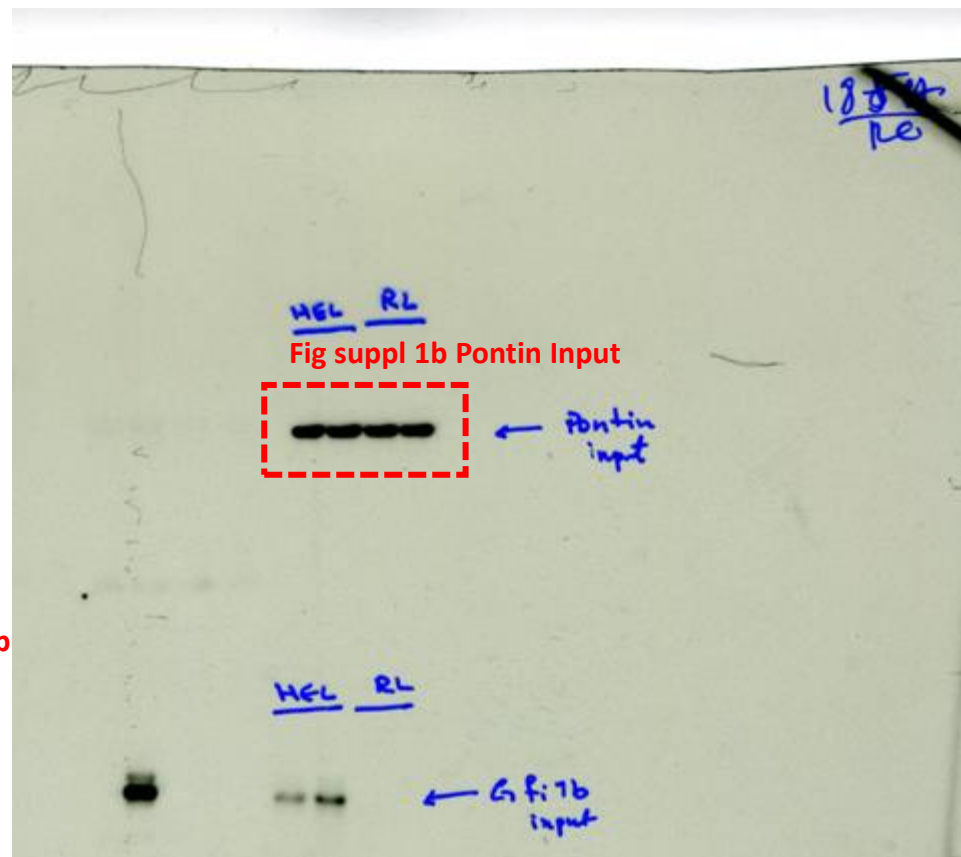

# Suppl Fig 2c

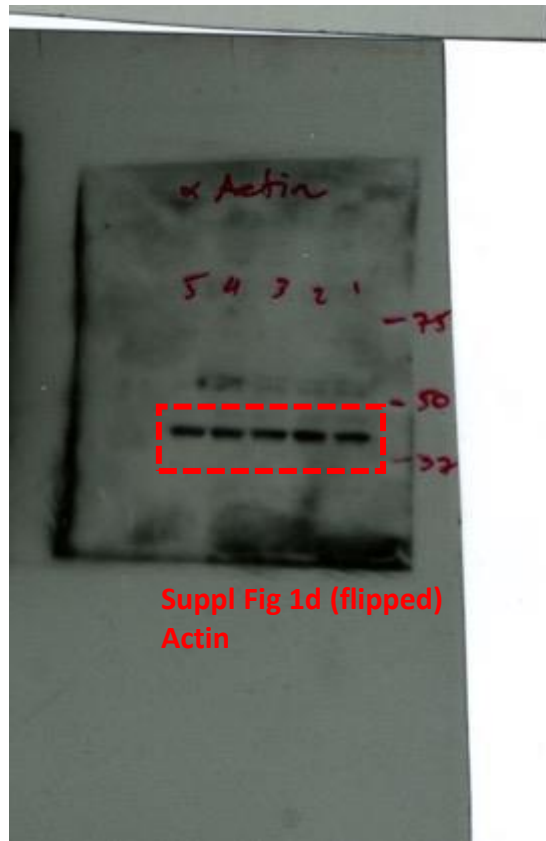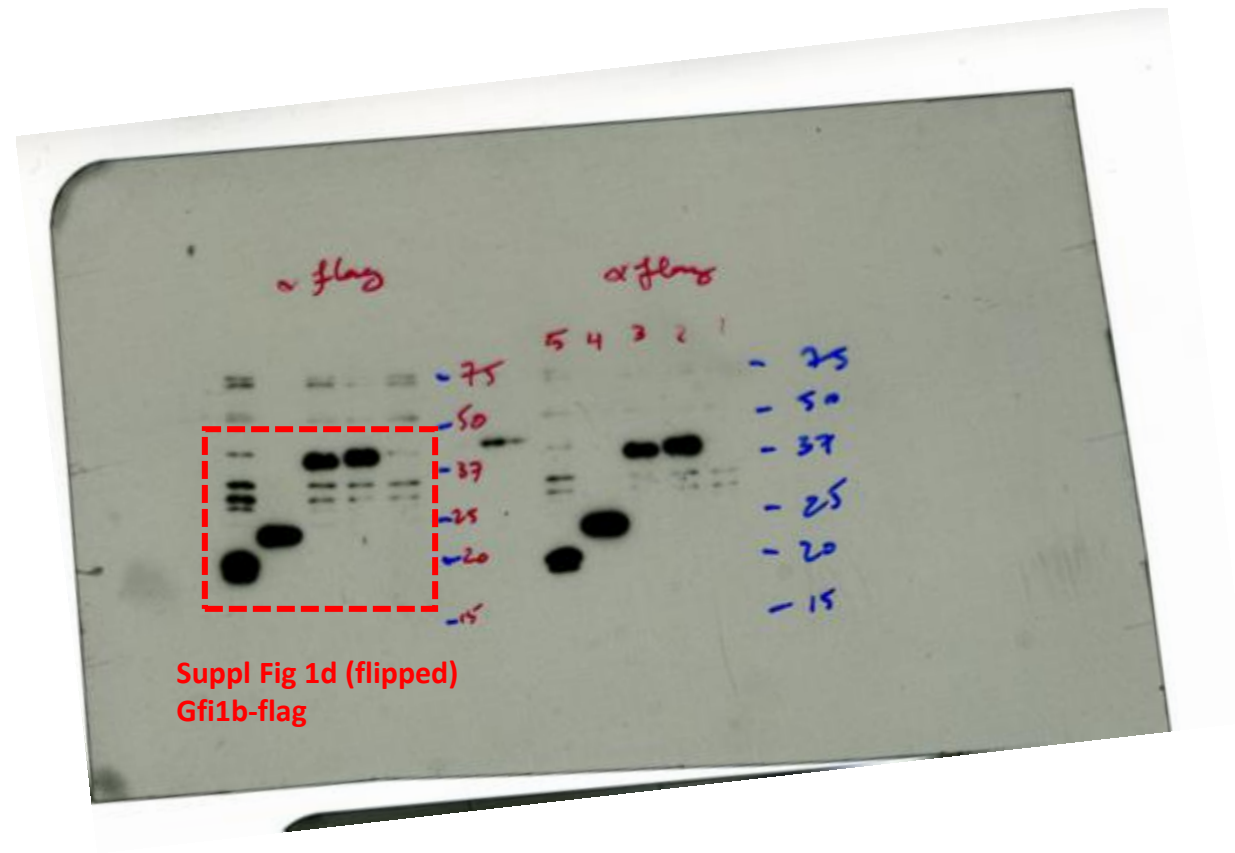

# Suppl Fig 6

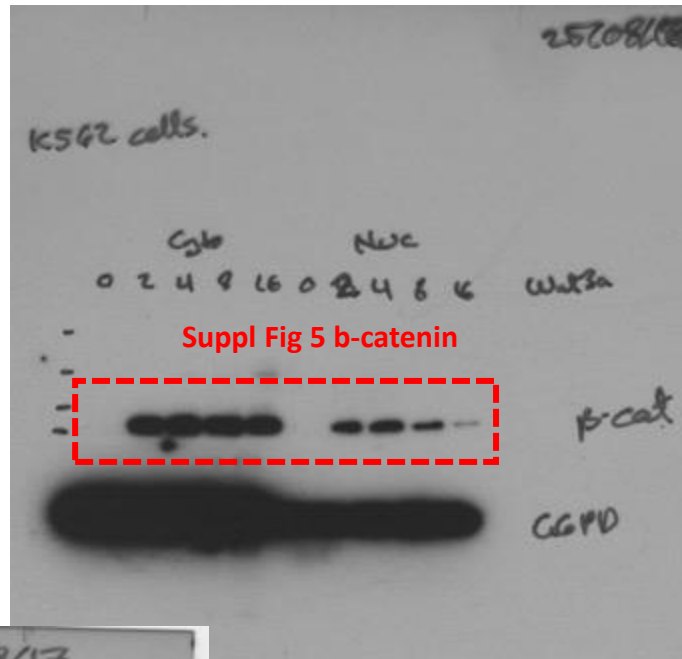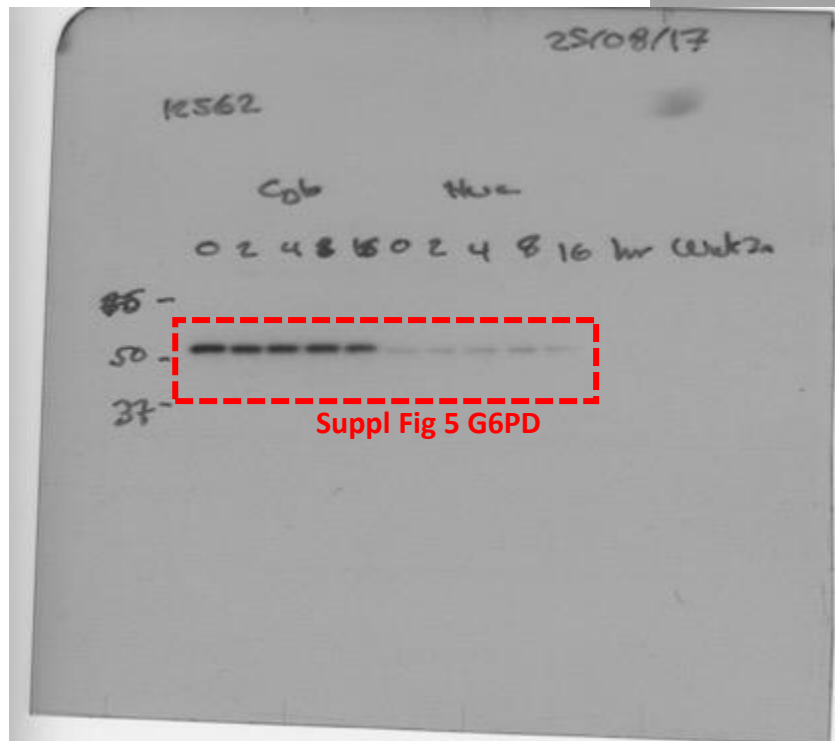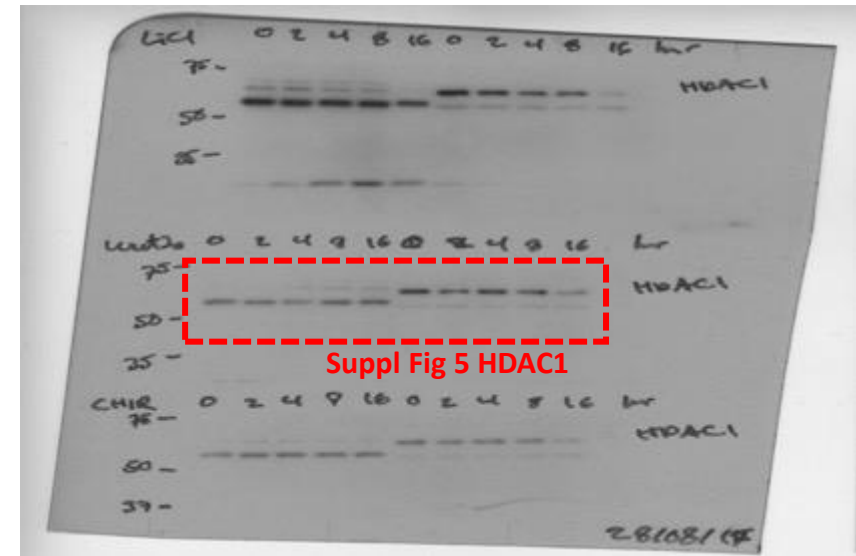



Supplementary Figure 9: Uncropped and unprocessed scans of western blots.

**Supplementary Table 1**

| Sample                | total number of reads | uniquely mapped |
|-----------------------|-----------------------|-----------------|
| k562_h3k4me1_nownt1   | 25022437              | 20144080        |
| k562_h3k4me1_nownt2   | 26369037              | 21208732        |
| k562_h3k4me1_nownt3   | 26359923              | 21186662        |
| k562_h3k4me1_wnt1     | 27924278              | 23644354        |
| k562_h3k4me1_wnt2     | 26200328              | 22190501        |
| k562_h3k4me1_wnt3     | 27700026              | 23440462        |
| k562_h3k9me2_nownt1   | 27803372              | 23490680        |
| k562_h3k9me2_nownt2   | 26041154              | 22004891        |
| k562_h3k9me2_nownt3   | 27731173              | 23415096        |
| k562_h3k9me2_wnt1     | 30000720              | 23990723        |
| k562_h3k9me2_wnt2     | 29995486              | 24006466        |
| k562_h3k9me2_wnt3     | 28381687              | 22726595        |
| k562_h3_nownt1        | 30635981              | 24722006        |
| k562_h3_nownt2        | 30698192              | 24790726        |
| k562_h3_nownt3        | 29141934              | 23548877        |
| k562_h3_wnt1          | 28719475              | 23228954        |
| k562_h3_wnt2          | 26989688              | 21839831        |
| k562_h3_wnt3          | 28696587              | 23192652        |
| bcat_negwnt3a_k652_1  | 30278357              | 23856365        |
| bcat_negwnt3a_k652_2  | 30252789              | 23827307        |
| bcat_negwnt3a_k652_3  | 30557638              | 24057147        |
| bcat_poswnt3a_k652_1  | 33113078              | 26153388        |
| bcat_poswnt3a_k652_2  | 33070093              | 26110840        |
| bcat_poswnt3a_k652_3  | 33395664              | 26357755        |
| gfi1b_negwnt3a_k652_1 | 33439181              | 26360403        |
| gfi1b_negwnt3a_k652_2 | 33542289              | 26446165        |
| gfi1b_negwnt3a_k652_3 | 33887317              | 26709938        |
| gfi1b_poswnt3a_k652_1 | 35656335              | 28023486        |
| gfi1b_poswnt3a_k652_2 | 35607881              | 27976817        |
| gfi1b_poswnt3a_k652_3 | 36009188              | 28288322        |
| input_negwnt3a_1      | 34147910              | 28013067        |
| input_negwnt3a_2      | 34463978              | 28264241        |
| input_negwnt3a_3      | 34072210              | 27944362        |
| input_poswnt3a_1      | 35490751              | 29162353        |
| input_poswnt3a_2      | 35830439              | 29436526        |
| input_poswnt3a_3      | 35452587              | 29125706        |
| lsd1_negwnt3a_k652_1  | 35441162              | 28091909        |
| lsd1_negwnt3a_k652_2  | 35155023              | 27879997        |

|                      |          |          |
|----------------------|----------|----------|
| lsd1_negwnt3a_k652_3 | 35094745 | 27828170 |
| lsd1_poswnt3a_k652_1 | 37932502 | 30216123 |
| lsd1_poswnt3a_k652_2 | 38253033 | 30459060 |
| lsd1_poswnt3a_k652_3 | 37880962 | 30171928 |

Supplementary Table 1 : RNA-seq total read numbers and aligned read numbers

### Supplementary Table 2

Nusse targets up: adapted from Roel Nusse's Wnt targets website  
([http://web.stanford.edu/group/nusselab/cgi-bin/wnt/target\\_genes](http://web.stanford.edu/group/nusselab/cgi-bin/wnt/target_genes))

Labbe wnt3a up: PMID: 17210685

Labbe Wnt3a down: PMID: 17210685

Willert\_wnt\_signaling: PMID: 12095419

Kolligs targets: PMID: 24467841

GO canonical wnt: adapted from GO ontology, Gene Ontology Consortium  
(<http://www.geneontology.org>)

GO wnt: adapted from GO ontology, Gene Ontology Consortium  
(<http://www.geneontology.org>)

KEGG wnt: KEGG Pathway database (<https://www.genome.jp/kegg/pathway.html>)

Canonical Wnt targets: adapted from PMID: 17210685 , PMID: 24889652 and Roel Nusse's  
Wnt targets website ([http://web.stanford.edu/group/nusselab/cgi-bin/wnt/target\\_genes](http://web.stanford.edu/group/nusselab/cgi-bin/wnt/target_genes))

Non canonical Wnt targets: adapted from PMID: 29453334

Supplementary Table 2 : References of Gene sets used in GSEA

**Supplementary Table 3**

|                         |                             |         |
|-------------------------|-----------------------------|---------|
| <b>Figure 1g</b>        | Gfi1b wt/flox               | n = 70  |
|                         | Gfi1b flox/flox             | n = 220 |
|                         |                             |         |
| <b>Figure 3a</b>        | n =3 for each data point    |         |
| <b>Figure 3b</b>        | n =3 for each data point    |         |
| <b>Figure 3c</b>        | n =3 for each data point    |         |
| <b>Figure 3d</b>        | n =3 for each data point    |         |
| <b>Figure 3e</b>        | n =3 for each data point    |         |
| <b>Figure 3f</b>        | n =3 for each data point    |         |
| <b>Figure 3g</b>        | n =3 for each data point    |         |
| <b>Figure 3h</b>        | n =3 for each data point    |         |
| <b>Figure 3i</b>        | n =3 for each data point    |         |
| <b>Figure 3j</b>        | n =3 for each data point    |         |
| <b>Figure 3k</b>        | n =3 for each data point    |         |
|                         |                             |         |
| <b>Figure 4e</b>        | Gfi1b WT                    | n = 5   |
|                         | GFI1b KO                    | n = 5   |
|                         |                             |         |
| <b>Figure 5f</b>        | n =3 for each data point    |         |
| <b>Figure 5g</b>        | n =3 for each data point    |         |
|                         |                             |         |
| <b>Figure 7d</b>        | n =3 for each data point    |         |
|                         |                             |         |
| <b>Figure 8d</b>        | Gfi1b wt/flox wnt3a = 0     | n = 39  |
|                         | Gfi1b flox/flox wnt3a = 0   | n = 46  |
|                         | Gfi1b flox/flox wnt3a = 0.9 | n = 95  |
|                         | Gfi1b flox/flox wnt3a = 1.3 | n = 83  |
|                         | Gfi1b flox/flox wnt3a = 1.9 | n = 91  |
|                         | Gfi1b flox/flox wnt3a = 2.5 | n = 111 |
|                         | Gfi1b flox/flox wnt3a = 3.1 | n = 87  |
|                         | Gfi1b wt/flox wnt3a = 0.9   | n = 120 |
|                         | Gfi1b wt/flox wnt3a = 1.3   | n = 89  |
|                         | Gfi1b wt/flox wnt3a = 1.9   | n = 108 |
|                         | Gfi1b wt/flox wnt3a = 2.5   | n = 86  |
|                         | Gfi1b wt/flox wnt3a = 3.1   | n = 81  |
|                         |                             |         |
| <b>Supplementary 2b</b> | n =3 for each data point    |         |
|                         |                             |         |
| <b>Supplementary 8b</b> | b-catenin                   | n = 3   |

|                            |                             |         |
|----------------------------|-----------------------------|---------|
|                            | GFP                         | n = 2   |
|                            |                             |         |
| <b>Supplementary 8c</b>    | Gfi1b wt/flox wnt3a = 0     | n = 39  |
| <b>(Same as figure 8d)</b> | Gfi1b wt/flox wnt3a = 0.9   | n = 120 |
|                            | Gfi1b wt/flox wnt3a = 1.3   | n = 89  |
|                            | Gfi1b wt/flox wnt3a = 1.9   | n = 108 |
|                            | Gfi1b wt/flox wnt3a = 2.5   | n = 86  |
|                            | Gfi1b wt/flox wnt3a = 3.1   | n = 81  |
|                            | Gfi1b flox/flox wnt3a = 0   | n = 46  |
|                            | Gfi1b flox/flox wnt3a = 0.9 | n = 95  |
|                            | Gfi1b flox/flox wnt3a = 1.3 | n = 83  |
|                            | Gfi1b flox/flox wnt3a = 1.9 | n = 91  |
|                            | Gfi1b flox/flox wnt3a = 2.5 | n = 111 |
|                            | Gfi1b flox/flox wnt3a = 3.1 | n = 87  |



Supplementary Table 3 : The sample size of data points for each assay

**Supplementary Table 4**

**Primers used for ChIP-PCR**

| <b>Gene</b>        | <b>Forward Primer (5'-3')</b> | <b>Reverse Primer (5'-3')</b> |
|--------------------|-------------------------------|-------------------------------|
| Axin2              | GGCTGCGCTTTGATAAGGTC          | CCCGAAATCCATCGCTCTGA          |
| Bambi              | GATCGCCACTCCAGCTACATC         | CTTTGGTGAGCAGCACGG            |
| Birc5              | CTCCCTGCTTTGTCCCCATC          | CATCTGCAAGGGACAGCACA          |
| Ccnd1              | TCTGCCGGGCTTTGATCTTT          | GGCTCCAGGACTTTGCAACT          |
| CCRL2              | CAGGGAAATCAAAGGCGGGG          | TCCAGAGGATCTCTGAAGCG          |
| Cdh1               | CTCCCACCCAATCTGAACC           | CCTTCAGGCAGTCTTGTCCC          |
| Gapdh              | CCACATCGCTCAGACACCAT          | CCCGCAAGGCTCGTAGAC            |
| Intergenic control | CCTGGCCTCTCACACTCA            | AGAACCCTTGCTCTCCAC            |
| Nfat5              | TGCCCTCGGACTTCATCTCAT         | CAGATTCTCGCGAGTAGAGGG         |
| Ptk7               | CTCCTTTTCTGAGCCCGC            | CAACTCTCGGGTACTCACCG          |
| Rock2              | GTTAGTGTCTAAGCCGGGCA          | ATTCCGAATTAGCGGAGGCG          |
| SLC38A8            | GTCGGGGGTTGAGACCATTAG         | GTCCTTATCTGTCCGACACCA         |
| Sp5                | TTGATGATTGGGTAGCGGCA          | TAAGGACTTTGCTGGGCCG           |
| Sp8                | GTGGAATGGGCGGAACTGA           | ACACAAAAGTGCCCTCTCC           |
| Yaf2               | GCGTTTGAAGTCTCCGGC            | AGCTGTCGGGGAAACTCCT           |
| Zfp467             | CTCTCCTCCCCGCGAAGTT           | GTCACAATGGCGCTCG              |

**Primers used for q-PCR**

| <b>Gene</b> | <b>Forward Primer (5'-3')</b> | <b>Reverse Primer (5'-3')</b> |
|-------------|-------------------------------|-------------------------------|
| CCND1       | ATGCCAACCTCCTCAACGAC          | TCCTCCTCGCACTTCTGTTC          |
| NFAT5       | GACCCTGACAACCTATTCAAACC       | TGCTGTAAAGTCTGTGCTTG          |
| BIRC5       | ACGCCTGTAATACCAGCAC           | GCTCTTTCTCTGTCCAGTTTC         |
| PTK7        | AGCGTGGAGGTGTATGATG           | AAGTGTAGTTGCCAGCGTC           |
| ROCK2       | ACTTGGGAGAAATGGGGTGG          | AGGTAAATCCGATGAAAGGC          |

Supplementary Table 4 : Primers' list
