# Supplementary material for: Gfi1b regulates the level of Wnt/β-catenin signaling in hematopoietic stem cells and megakaryocytes
Source: PubMed Central journal article supplement (PMC6426870; doi:10.1038/s41467-019-09273-z), 2019-03-20
Supplement: 41467_2019_9273_MOESM4_ESM.pdf [file 41467_2019_9273_MOESM4_ESM.pdf]

## **Description of Additional Supplementary Files**

### **Supplementary Data 1**

Expression fold change results from RNA seq

### **Supplementary Data 2**

List of genes bound Gfi1b, LSD1 and b-catenin mouse CHIP-seq

### **Supplementary Data 3**

List of genes bound by Gfi1b, LSD1 and b-cateninK562 CHIP-seq

### **Supplementary Data 4**

Enhancer list bound by Gfi1b, LSD1 and b-catenin K562 CHIP-seq
